1 **Title page**

2

3 **Title:** Decoding of EEG signals reveals non-uniformities in the neural geometry of colour

4

5 **Authors and Affiliations:**

6 Tushar Chauhan <sup>\*1,2</sup>, Ivana Jakovljević<sup>3</sup>, Lindsay N. Thompson<sup>4</sup>, Sophie M. Wuerger<sup>5</sup>, and Jasna  
7 Martinovic <sup>\*6</sup>

8 <sup>1</sup> Centre National de la Recherche Scientifique, 31055 Toulouse, France

9 <sup>2</sup> Centre de Recherche Cerveau et Cognition, Université de Toulouse, 31052 Toulouse, France

10 <sup>3</sup> Department of Psychology, Faculty of Philosophy, University of Novi Sad, 21000 Novi Sad, Serbia

11 <sup>4</sup> School of Psychology, University of Aberdeen, Aberdeen, AB24 3FX, UK

12 <sup>5</sup> Department of Psychology, University of Liverpool, Liverpool, L697ZA, UK

13 <sup>6</sup> Department of Psychology, School of Philosophy, Psychology and Language Sciences, University of  
14 Edinburgh, Edinburgh, EH8 9JZ, UK

15

16 *\*Corresponding authors:* TC: [research@tusharchauhan.com](mailto:research@tusharchauhan.com), JM: [jmartino@ed.ac.uk](mailto:jmartino@ed.ac.uk)

17

18 **Acknowledgments:** TC was partly supported by grant FRM: SPF20170938752 (Fondation pour la  
19 Recherche Médicale). JM was partly supported by grants BB/H019731/1 and BB/R009287/1 from the  
20 Biotechnology and Biological Sciences Research Council (BBSRC).

21

22 **Conflict of Interest:** The authors declare no competing financial interests.

23

24 **Abstract**

25 The idea of colour opponency maintains that colour vision arises through the comparison of two  
26 chromatic mechanisms, red versus green (RG) and yellow versus blue (YB). The four unique hues,  
27 red, green, blue, and yellow, are assumed to appear at the null points of these the two chromatic  
28 systems. However, whether unique hues have a distinct signature that can be reliably discerned in  
29 neural activity is still an open question. Here we hypothesise that, if unique hues represent a tractable  
30 cortical state, they should elicit more robust activity compared to non-unique hues. We use a  
31 spatiotemporal decoding approach to reconstruct an activation space for a set of unique and  
32 intermediate hues across a range of luminance values. We show that electroencephalographic (EEG)  
33 responses carry robust information about isoluminant unique hues within a 100-300 ms window from  
34 stimulus onset. Decoding is possible in both passive and active viewing tasks, but is compromised  
35 when concurrent high luminance contrast is added to the colour signals. The efficiency of hue  
36 decoding is not entirely predicted by their mutual distance in a nominally uniform perceptual colour  
37 space. Instead, the encoding space shows pivotal non-uniformities which suggest that anisotropies in  
38 neurometric hue-spaces are likely to represent perceptual unique hues. Furthermore, the neural code  
39 for hue temporally coincides with the neural code for luminance contrast, thus explaining why  
40 potential neural correlates of unique hues have remained so elusive until now.

41

42 **Keywords:** unique hues, electroencephalography, decoding, neural mechanisms, colour perception

43

## 44 **Introduction**

45 The idea of colour opponency maintains that colour vision arises through the comparison of two  
46 chromatic mechanisms, red versus green (RG) and blue versus yellow (BY). The four unique hues,  
47 red, green, blue, and yellow, are assumed to appear at the null points of these the two chromatic  
48 systems (Hering, 1920; Jameson and Hurvich, 1964; De Valois and De Valois, 1993). Colour vision  
49 starts in the retina, where light is absorbed in receptors (long-, medium, and short-wavelength  
50 sensitive cone receptors – L, M, S) and small bistratified ganglion cells that receive S-(M+L) cone  
51 input have been postulated to be the retinal origin of the BY channel, while midget ganglion cells that  
52 take the differences between the L and M cone output were believed to be the retinal origin of the RG  
53 channel (Lee et al., 2010). However, it has now been confirmed that the chromatic tuning of  
54 behaviourally characterised opponent channels differs from these early cone-opponent mechanisms,  
55 hence another transformation of chromatic signals must take place between the Lateral Geniculate  
56 Nucleus (LGN) and the primary or extrastriate visual cortex (De Valois and De Valois, 1993;  
57 Wuerger et al., 2005).

58

59 While some neuroimaging studies have attempted to identify a neural basis for unique hues, their  
60 results remain controversial. Stoughton and Conway (2008) reported neuronal clusters which were  
61 preferentially tuned to unique hues in the posterior inferior temporal (PIT) cortex of macaques.  
62 However, their findings have been challenged on the grounds that the study was not fully controlled  
63 for low-level differences in neuronal tuning, which could provide a more parsimonious explanation  
64 for their results (Conway and Stoughton, 2009; Mollon, 2009; Bohon et al., 2016). Similarly, Forder  
65 et al. (Forder et al., 2017a) reported that event-related potentials (ERPs) for unique hues show  
66 decreased latencies compared to non-unique hues. But the reported difference in peak latencies could,  
67 once again, have stemmed from differential activation of low-level, cone-opponent processes, to  
68 which ERPs are particularly sensitive (Rabin et al., 1994; Knoblauch et al., 1998). Thus, the neural  
69 basis of these cortical hue-opponent chromatic systems, and consequently, the unique hues, still  
70 remains an open problem.

71

72 One of the major reasons for the failure to address this issue has been the fact that neural activity is  
73 rich in coding possibilities which complicate our understanding of the relationship between external  
74 stimuli and the evoked response (Johnson, 2000; Jazayeri and Afraz, 2017). This is particularly true if  
75 potential low-level confounds can lead to a stronger, overlapping signal. This seems to be the case for  
76 unique hues, whose encoding is bound to overlap with, and be influenced by, the encoding of  
77 luminance contrast (see, e.g., Nunez et al., 2017). Ritchie et al. (2019) suggest that an ideal way to  
78 utilise neural decoding is to reconstruct an activation space from multivariate neural data and make  
79 psychological inferences by assessing whether such activation spaces correspond to psychological  
80 constructs. Recent studies have begun to apply this approach to challenges in colour neuroscience  
81 such as identifying the neural representations that underlie colour geometries (Rosenthal et al., 2021).

82

83 We hypothesise that, if there is indeed a distinct and discernible neural signature for unique hues, it  
84 should be reflected in the structure of the neurometric hue-representational space described by EEG  
85 signals. We used a decoding paradigm to test this hypothesis in two stages. First, we demonstrate that  
86 under isoluminant conditions, hue information can indeed be extracted from EEG signals, and that  
87 crucially, the encoding for unique hues is more robust than non-unique hues. To establish that our  
88 predictions generalise beyond a single decoding context (stimulus or task-wise), we test our decoding  
89 prediction using both active and passive viewing tasks. Second, we show that the structure of the  
90 neurometric space which encodes hue is distorted in the local neighbourhood of unique hues –  
91 suggesting a correspondence between low neural variability and unique hue percepts. Taken together,  
92 our findings suggest that the neural basis of perceptual unique hues is likely to be a set of stable fixed-  
93 points of a spatiotemporal population code for colour representations in the cortex.

94

95

96

## 97 **Methods**

### 98 **Participants**

99 In Experiment 1, twenty participants (16 females, 4 males) completed the study, ranging in age from  
100 18-38 y.o. a. (mean age 21 y.o.a). In Experiment 2, 16 participants (all female) completed the study,  
101 ranging in age 19 – 32 years old (mean age 22 years). All participants reported normal or corrected-  
102 to-normal visual acuity, In Experiment 1, their colour vision was verified using the Trivector  
103 Cambridge Colour Test (Regan et al., 1994). In Experiment 2, we relied on the City University Colour  
104 Vision Test (Fletcher, 1975). Participants gave written informed consent and were reimbursed for  
105 their effort and time. The study was approved by the ethics committee of the School of Psychology,  
106 University of Aberdeen, and was in accordance with the Declaration of Helsinki.

107

### 108 **Stimuli and Procedure**

109 The experiments were programmed using the CRS Toolbox and Color Toolbox (CRS, UK) for  
110 MATLAB (Mathworks, USA). In Experiment 1, stimuli were rendered on a 21-inch Viewsonic  
111 P227F CRT Monitor which was placed 70 cm away from the participant. The monitor was controlled  
112 through a Visage system (CRS, UK) and calibrated using ColorCAL2 (CRS, UK). Colours were  
113 generated on the basis of measurements taken with a SpectroCAL (CRS, UK). Participants gave their  
114 responses using a Cedrus R530 response box (San Pedro, USA). In Experiment 2, colours were  
115 presented on a Display ++ (CRS, UK) device. Responses were recorded using a CT-6 button box  
116 (CRS, UK).

117 Different sets of colours were used in the two experiments. In Experiment 1, stimulus colours were  
118 selected from a normative dataset (Wuerger and Xiao, 2015) (see Supplementary **Figure S3A**). The  
119 hue angles for unique red (UR) and unique green (UG) stimuli corresponded to mean values in the  
120 dataset – in the perceptually uniform CIE 1976 UCS space (Schanda, 2016), hue angles for the UR

121 and UG stimuli were 14.4° and 133.4° respectively. Orange and turquoise stimuli were chosen such  
122 that orange (hue angle 41.5°) was the intermediate hue between UR and unique yellow, and turquoise  
123 (hue angle 185.1°) was the intermediate between UG and unique blue. All four stimuli were equally  
124 saturated in the CIE 1976 UCS plane. Three stimulus luminance levels were used: nominal iso-  
125 luminance (24 cd/m<sup>2</sup>), 45% Weber contrast (34.8 cd/m<sup>2</sup>) and 90% Weber contrast (45.6 cd/m<sup>2</sup>). In  
126 Experiment 2, stimuli consisted of participants' subjective settings for two unique hues (yellow and  
127 green) and two intermediate hues (orange and turquoise), and hues situated 10° to the left and right of  
128 the subjective settings (in CIELCh colour space). Thus, for each observer, we effectively had four  
129 clusters of colours corresponding to the hues orange, yellow, green, and turquoise, with each cluster  
130 consisting of the observer setting for that hue, along with two flanking colours  $\pm 10^\circ$  from the setting  
131 (e.g., unique yellow, a yellow 10° counter-clockwise and a yellow 10° clockwise). All colours were  
132 nominally isoluminant with the background (CIE 1931 xyY coordinates: 0.3127, 0.3290, 22.93  
133 cd/m<sup>2</sup>).

134

135 EEG data was recorded during a shape discrimination task. The purpose of the task was to engage  
136 participants' attention in a stimulus dimension orthogonal to colour - i.e., shape. The stimuli consisted  
137 of uniformly coloured shapes shown against a grey background. Each trial began with the appearance  
138 of a fixation cross, followed by a 2-degree circular stimulus (passive viewing event) which changed  
139 shape (shape change event) into either a diamond or a square (**Figure 1**). The passive viewing event  
140 occurred  $700 \pm 200$  ms after the appearance of the fixation cross, and the shape change event occurred  
141 800-1500 ms after the passive viewing event.

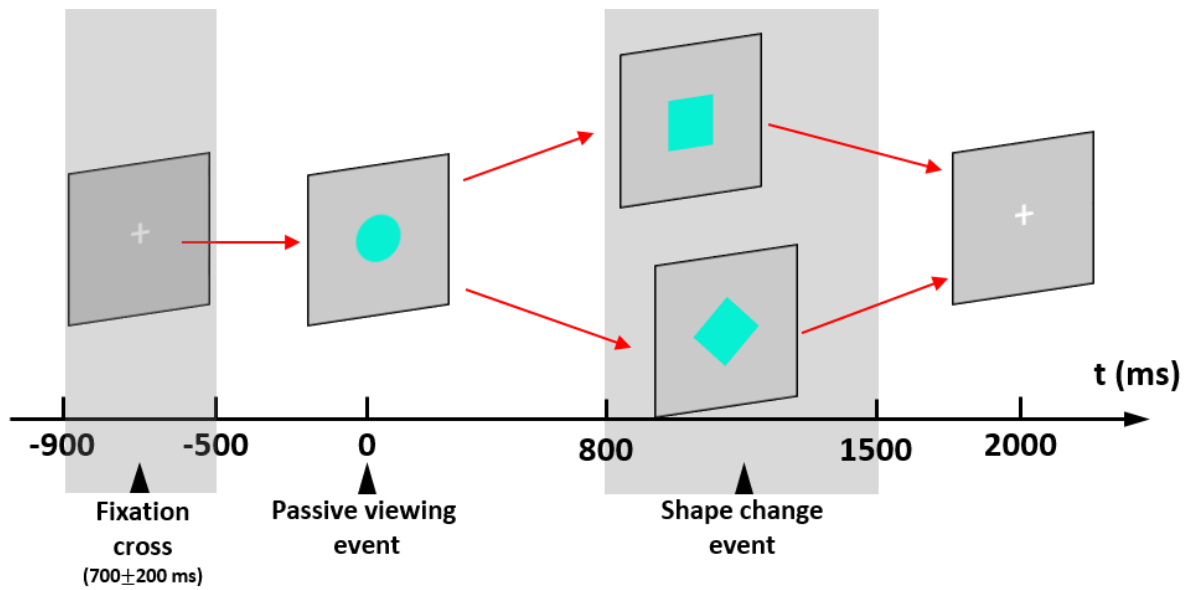

143 **Figure 1:** Experimental design. Each trial started with the appearance of a fixation cross, which was followed  
144 by the presentation of a circular uniformly-coloured stimulus at a random offset of  $700 \pm 200$  ms. At a random  
145 time-point 800-1500 ms after stimulus onset, the shape of the stimulus changed from circular to either square or  
146 diamond. Participants were instructed to discriminate the final shape via a button press as quickly and as  
147 accurately as they could. Each trial ended 2 seconds after stimulus onset. Two events were defined during each  
148 trial: a passive viewing event defined by the appearance of the stimulus, and a shape change event defined by  
149 the change in stimulus shape.

150

151 Participants identified the final shape of the stimulus using the left or the right button on a button box.  
152 The assignment of button to the target shape was counterbalanced between participants. The  
153 conditions were randomly intermixed, with a different order for each participant. The entire  
154 experiment was conducted in a sound-attenuated, electrically shielded chamber, with the screen being  
155 the only source of light. In addition to EEG recordings (described below), two other task-related  
156 variables were measured – task accuracy and reaction time. For each colour and shape combination,  
157 we had 30 trials. As diamond and square shape-change trials were subsequently collapsed together,  
158 this resulted in 60 trials per colour and 720 trials in total, presented in random order and divided into  
159 10 blocks. This was the same for both experiments. In addition, Experiment 1 was preceded by a  
160 practice of 24 trials, while Experiment 2 was preceded by a practice of 16 trials. The EEG task took  
161 approximately 50 minutes to complete.

162

163 After the completion of the EEG experiment, participants rated each colour on a 9-point Likert scale  
164 for its representativeness of its category. This took approximately 5 minutes. Participants were asked  
165 to imagine the perfect representative for a colour category and rate how representative a sample was  
166 of that category, with 1 being the least representative and 9 being the most representative. All colours  
167 were displayed simultaneously on the screen during this procedure and remained on the screen until  
168 the participants completed the task. Colours were presented on the computer screen as a set of 4 rows  
169 of squares that showed the three luminance (Experiment 1) or hue (Experiment 2) values for that  
170 colour.

171 There were also two additional measures, specific to each experiment. In Experiment 1, for each  
172 participant, heterochromatic flicker photometry (HCFP) at 20 Hz (Walsh, 1958) was used to establish  
173 the departure from isoluminance for all colours. The task required the participant to adjust the  
174 luminance of the colour until perceived flicker was minimised. Participants performed 8 trials per  
175 colour – the step size was 0.5 cd/m<sup>2</sup> and the flicker started from a randomly determined point that  
176 could be five steps above or below nominal isoluminance. These measurements were conducted to  
177 evaluate any individual differences in the amount of luminance contrast effectively present in  
178 nominally isoluminant stimuli. Rabin et al. (1994) demonstrate that departures from isoluminance  
179 need to be substantial to influence chromatic visual evoked potentials. Collecting HCFP data enabled  
180 us to verify that small departures from effective luminance did not significantly influence the  
181 efficiency of colour decoding.

182 Experiment 2 began with a hue adjustment task, in which participants made their individual hue  
183 settings for two unique hues (yellow and green) and two intermediate, non-unique hues (orange and  
184 turquoise). Participants performed one block of eight trials for each hue. The order of blocks (yellow,  
185 green, orange, turquoise) was randomized for each participant. Colours were defined in CIE LCh  
186 colour space to have the same chroma (C=25) and lightness (L=55). Initial hue angles were  
187 randomised to the following values: 90°± 12° for yellow, 180°± 12° for green, 45°± 12° for



188 orange and  $225^{\circ} \pm 12^{\circ}$  for turquoise. A coloured  $2^{\circ}$  circle was shown in the middle of the computer  
189 screen. Participants used the right and left buttons to change the hue along the CIE LCh hue circle in  
190 steps of  $2^{\circ}$  clockwise and counter-clockwise, respectively. Once the participants were happy with  
191 their setting, they completed the adjustment by pressing the top button. The task took approximately  
192 10 minutes to complete. The first 6 participants performed the task without context. For the following  
193 13 participants, we also presented a colour palette consisting of 19 squares  $1^{\circ}$  in size that ranged  $\pm$   
194  $45^{\circ}$  around the initial hue value, in steps of  $5^{\circ}$  of hue angle, positioned at  $8.22^{\circ}$  above the central  
195 stimulus. The colour palette provided context for the hue setting task. A between-subject ANOVA  
196 showed no difference in unique hue settings with and without context ( $F(1,14) = 0.23$ ;  $p = .64$ ,  $\eta p^2 =$   
197  $.02$ ).

198 In total, the experiments lasted between two and a half and three hours, including the time to set up  
199 and remove the EEG electrodes.

200

## 201 **EEG recording and pre-processing**

202 Continuous brain activity was recorded from 64 scalp locations using active Ag-AgCl electrodes and  
203 4 ocular channels (providing VEOG and HEOG) connected to a BioSemi Active-Two amplifier  
204 system (BioSemi, Amsterdam, The Netherlands) at a sampling rate of 256 Hz. Data processing was  
205 performed using EEGLAB (Delorme and Makeig, 2004) for Matlab (Mathworks, UK). Epochs lasting  
206 900 ms were extracted: 200 ms before the relevant event (stimulus onset or shape change) and 700 ms  
207 afterwards. Data was low pass filtered at 40 Hz. All trials with incorrect answers were excluded prior  
208 to the analysis. Artifact removal was then performed by using the FASTER toolbox (Nolan et al.,  
209 2010), the ADJUST toolbox (Mognon et al., 2011), and self-written procedures in  
210 MATLAB. FASTER is an automated procedure that detects contaminated trials and noisy channels  
211 that need interpolation (either in the entire EEG recording or on any single trials) by calculating  
212 statistical parameters of the data and using a Z score of  $\pm 3$  as the metric that defined contaminated  
213 data. ADJUST is an automated procedure that operates on maps resulting from independent

214 component analysis of EEG data, using properties of these components to label them as eye blinks,  
215 vertical or horizontal eye movements, or channel discontinuities so that they can be subtracted from  
216 the recording. We first rejected trials with global artifacts using FASTER, then ran an independent  
217 component analysis and applied ADJUST to the obtained decompositions, and finally, conducted  
218 channel interpolation with FASTER. In addition, any trials with eye movements were rejected based  
219 on  $\pm 25\mu\text{V}$  deviations from the horizontal electrooculogram in the uncorrected data. Blinks were  
220 rejected using a thresholding procedure similar to FASTER (Junghöfer et al., 2000).

221 Incorrect and rejected trials amounted to a very small proportion of the data – in Experiment 1,  
222 between 1% and 13% of total trials, and in Experiment 2, between 3% and 17% of total trials.

223

## 224 **EEG classification**

225 The classification of EEG signals was set up as a set of time-windowed error-correcting output codes  
226 models (tECOC) operating on 20ms snippets of the signals (other reasonable time-windows yielded  
227 similar results, see Supplementary **Figure S1A**) from the occipital electrodes (the entire set of 64  
228 electrodes yielded similar results, see Supplementary **Figure S1B**). Linear discriminant analysis  
229 (LDA) classifiers were employed as learning units due to their relative simplicity and computational  
230 efficiency. Denoting the EEG activity as a random multivariate variable  $\mathbf{X}$ , and the stimulus label  
231 (colour and/or luminance) by the random variable  $Y$  (where realisations of  $Y$  are drawn from the set of  
232 all possible labels denoted  $L$ ), the probability that the observed activity  $\mathbf{x}$  is elicited by the stimulus  
233 described by label  $y$  is given by the Bayes rule:

$$234 \quad P(Y = y | \mathbf{X} = \mathbf{x}) = \frac{P(\mathbf{X} = \mathbf{x} | Y = y)P(Y = y)}{\sum_{l \in L} P(\mathbf{X} = \mathbf{x} | Y = l)P(Y = l)}$$

235 In LDA, the likelihood term is estimated by a multivariate Gaussian density function:

$$236 \quad P(\mathbf{X} = \mathbf{x} | Y = y) = \frac{1}{\sqrt{(2\pi)^{N_e} |\Sigma|}} e^{-\frac{1}{2}(\mathbf{x} - \boldsymbol{\mu}_y)^T \Sigma^{-1} (\mathbf{x} - \boldsymbol{\mu}_y)}$$

237 Here,  $N_e$  is the number of electrodes,  $\boldsymbol{\mu}_y$  is the mean EEG activity for the label  $y$ , and  $\Sigma$  is the  
238 covariance matrix of the activity. The log-posterior objective function  $\delta_y(\mathbf{x})$  for the label  $y$  can thus  
239 be written as:

$$240 \quad \delta_y(\mathbf{x}) = \log P(Y = y) - \frac{1}{2} \boldsymbol{\mu}_y^T \Sigma^{-1} \boldsymbol{\mu}_y + \mathbf{x}^T \Sigma^{-1} \boldsymbol{\mu}_y$$

241 Data for each observer was modelled separately, and the whole process was repeated 10 times. In  
242 each repetition for any given observer, the data were split into 5 folds containing roughly equal  
243 number of samples for each label. Each of the five folds was then tested by training the model on the  
244 remaining 4 folds.

245

246 tECOC analysis gave us a time-series of confusion matrices (CMs) which characterise the model  
247 performance over the duration of the trial (see Supplementary **Video V1**). At each time-point, while  
248 the diagonal of the CM gives a measure of model accuracy (true positive rate), the off-diagonal  
249 elements represent misclassifications, which are crucial towards understanding the topography and  
250 information content of the representational space (see Representational Similarity Analysis below). In  
251 addition, a permuted model was also trained using a shuffled set of labels to estimate empirical chance  
252 performance. The empirical chance performance was found to be close to theoretical chance level  
253 under the assumption of equilikelihood (see Supplementary **Figure S1C**). The statistics (both within-  
254 observer and population) were calculated at each time-point by comparing model performance with  
255 empirical chance performance of the ‘permuted’ models using a two-tailed randomisation test with  
256 1000 permutations.

257

## 258 **Representational Similarity Analysis**

259 The time-series of confusion matrices estimated by tECOC models were used to calculate pairwise  
260 dissimilarities between stimulus classes. Given a confusion matrix  $C$ , where each element  $c_{ij}$  denotes

261 the probability of the stimulus type  $i$  being labelled as  $j$  by the model, first, a label-normalised matrix  
262  $S$  was constructed such that  $s_{ij} = c_{ij}/c_{ii}$ . This asymmetric measure was then used to calculate a  
263 symmetric dissimilarity tensor  $\Delta_{tECOC}$  given by

$$264 \quad \Delta_{tECOC} = 1 - \max\left(0, 1 - \sqrt{SS^T}\right)$$

265 Here, the geometric mean across stimulus pairs is used to generalise distances in representational  
266 space (Shepard, 1958; Kaneshiro et al., 2015). A similar estimation was also made for the EEG data  
267 using a more traditional dissimilarity metric given by

$$268 \quad \Delta_{EEG} = 1 - |\rho|$$

269 Here,  $\rho$  is the Pearson-correlation matrix for the EEG responses elicited by the stimuli. Finally,  
270 pairwise differences in CIELAB hue angles of the stimuli were used to estimate a perceptual  
271 dissimilarity matrix. The perceptual dissimilarity was compared to  $\Delta_{tECOC}$  and  $\Delta_{EEG}$  using rank-  
272 correlation estimates (Kendall's coefficient).

273

274

## 275 **Results**

### 276 **Experiment 1: Decoding unique and intermediate hues with and without luminance contrast**

277 We measured EEG signals in a cohort of 20 participants while they viewed coloured stimuli (coloured  
278 shapes on a grey background) consisting of two unique hues – unique green and unique red, and two  
279 non-unique hues – orange and turquoise. In each trial, a coloured disc changed shape to a diamond or  
280 a square at a random time-point 800-1500ms after stimulus onset (**Figure 1**). The participant's task  
281 was to identify the target shape. The stimuli were either isoluminant with the background (0%  
282 luminance contrast), or presented at 45% or 90% luminance-contrast. This gave us a dataset of EEG  
283 signals labelled both in hue and luminance-contrast.

284

285 The task was easy, resulting in high overall accuracy ( $95\% \pm 1\%$  SE, see Supplementary **Figure S4A**)  
286 and very fast responses (mean response time (RT) of  $462 \pm 15$  ms, see Supplementary **Figure S4B**).  
287 Response-time data was analysed with a 3x4 repeated measures ANOVA (3 levels of luminance  
288 contrast vs. 4 hues), which yielded a significant main effect of luminance contrast ( $F(1.49, 28.28) =$   
289  $67.56, p < 0.001, \mu p^2 = 0.78$ ) and interaction with hue ( $F(6, 114) = 3.56, p = 0.003, \mu p^2 = 0.16$ )  
290 – hue itself did not have an effect ( $F(1.88, 35.79) = 2.93, p = 0.07$ ). We deconstructed the  
291 interaction by performing separate repeated measures ANOVAs at each luminance contrast: while at  
292 isoluminance there was a significant effect ( $F(3, 57) = 6.19, p = 0.001, \mu p^2 = 0.25$ ) driven by  
293 slower RTs for green (vs. red  $P = 0.019$ ; vs orange  $P = 0.008$ , vs. turquoise  $P = 0.003$ ), there were  
294 no differences at 45% luminance contrast ( $p = 0.16$ ) or at 90% luminance contrast ( $p = 0.11$ ).

295

296 After the completion of the EEG experiment, participants rated each colour on a 9-point Likert scale  
297 for its representativeness of its category (red, orange, green or turquoise). The average ratings and  
298 their SEs were as follows (see Supplementary **Figure S4C**): isoluminant red  $4.35 \pm 0.48$ ; red at 45%  
299 luminance  $2.85 \pm 0.32$ ; red at 90% luminance  $1.90 \pm 0.23$ ; isoluminant green  $7.70 \pm 0.23$ ; green at  
300 45% luminance  $6.10 \pm 0.35$ ; green at 90% luminance  $5.55 \pm 0.43$ ; isoluminant orange  $3.75 \pm 0.48$ ;  
301 orange at 45% luminance  $4.15 \pm 0.43$ ; orange at 90% luminance  $3.60 \pm 0.32$ ; isoluminant turquoise  
302  $6.00 \pm 0.47$ ; turquoise at 45% luminance  $6.75 \pm 0.38$ ; turquoise at 90% luminance  $6.40 \pm 0.5$ .

303

### 304 **Unique hues can be robustly decoded from EEG signals**

305 First, we asked whether the measured EEG waveforms contain consistent, discernible information  
306 about the hue of the stimulus. To do this, we trained tECOC models for each observer using only EEG  
307 responses to isoluminant stimuli, as this ensured minimal interference from luminance-contrast  
308 signals. In the first instance, we performed this analysis for epochs defined by the passive viewing

309 event. We found that within a 100-300 ms window after stimulus onset, both unique hues could be  
310 decoded with above-chance accuracy (**Figure 2A**). The non-unique hues, on the other hand, showed a  
311 much lower score (**Figure 2B**). This pattern is stable over a range of tECOC time-windows  
312 (Supplementary **Figure S1A**) and also holds when the entire set of 64 electrodes is used  
313 (Supplementary **Figure S1B**). The presence of signal on all electrodes is not surprising – unlike  
314 functional magnetic resonance imaging (fMRI), EEG does not detect localised physiological activity  
315 in a volume, but instead picks up a linear superposition of signals from a range of physiological  
316 sources. Thus, the signal is present in some degree at all sensors, with its amplitude (and thus also its  
317 signal to noise ratio) dependent on the position of the sensor relative to the source(s) (see, e.g., Maris,  
318 2012 for a discussion of the so-called common pick-up problem).

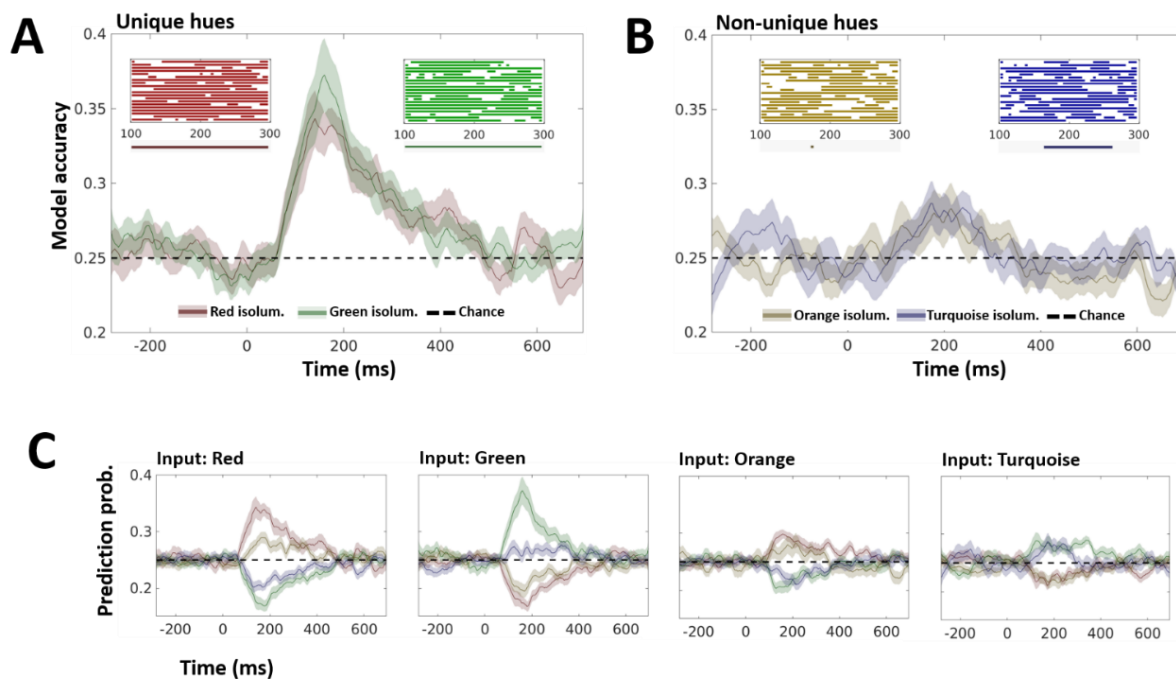

319

320 **Figure 2:** Decoding isoluminant Unique and Non-unique hues from EEG responses. A tECOC classification  
321 model was trained on EEG responses recorded in  $N = 20$  participants as they viewed isoluminant stimuli  
322 (Unique Hues: red and green; Non-unique hues: orange and turquoise). **A.** Model accuracy for Unique hues.  
323 This corresponds to presenting the trained model with EEG responses to Unique Hue stimuli and estimating the  
324 probability with which the model is able to determine the correct stimulus hue (diagonal of the confusion  
325 matrix). The two solid lines show the mean accuracy of the model at each time-point. The hues are colour-  
326 coded, with the red and green lines representing model accuracy for unique red and unique green stimuli  
327 respectively. The shaded regions around the lines show  $\pm 1$  standard-error of the mean over the 20 observers. A

328 dashed line indicates the theoretical chance performance of the model (the empirical chance performance  
329 closely followed the theoretical chance level, and is shown in Supplementary **Figure S1C**). The two inlays show  
330 the classification accuracy (top-left: unique red, top-right: unique green) of models trained for each of the 20  
331 observers. Only 100-300 ms after stimulus onset are shown in the inlays. The solid lines show the period when  
332 the classification performance was significantly above chance ( $p < 0.05$  in a permutation test comparing  
333 observer-model performance to the performance of a model trained on randomly shuffled labels). Under the x-  
334 axis of the inlays, a solid line shows when the mean accuracy calculated across all observers was above chance  
335 ( $p < 0.05$  in a permutation test comparing average performance over all observers to the average performance  
336 of models trained on random labels). **B.** Model accuracy for non-unique hues. The accuracy of the model for  
337 non-unique hues is shown in a manner analogous to **A**, with the orange and blue colours representing the orange  
338 and turquoise stimuli respectively. **C.** Misclassification probabilities. Given the EEG response (at a given time-  
339 point) to one of the four hues, the model can either make an accurate prediction of the label (panels **A** and **B**), or  
340 misclassify the input. Each of the four subpanels here shows the prediction probabilities for one particular input  
341 label (shown on the top-left, above each subpanel), thus corresponding to one row of the confusion matrix. For  
342 instance, the first subpanel shows the probabilities (at each time-point) that the model classifies EEG responses  
343 to unique green stimuli as being elicited by unique green (accuracy), unique red, orange or turquoise stimuli.  
344 The colour coding for the four stimulus hues in each subpanel is the same as panels **A** and **B**. Also see  
345 Supplementary **Video V1**, which shows how the confusion matrix changes as a function of time elapsed from  
346 stimulus onset.

347

348 For each participant, we also measured subjective isoluminance for each stimulus colour (see *Methods*  
349 for details). While one participant did not understand the task, the means, SEs and ranges of the  
350 settings from the remaining 19 participants were as follows: red  $0.14 \pm 0.57 \text{ cd/m}^2$  (-6 to 5.25  
351  $\text{cd/m}^2$ ); green  $-1.09 \pm 0.49 \text{ cd/m}^2$  (-6.58 to 1  $\text{cd/m}^2$ ); orange  $0.08 \pm 0.56$  (-4.34 to 6.50  $\text{cd/m}^2$ );  
352 turquoise ( $-0.05 \pm 0.65 \text{ cd/m}^2$  (-7.08 to 7.83  $\text{cd/m}^2$ ).

353

354 Model accuracy quantifies the ability of the model to correctly identify the hue of a stimulus when  
355 presented with the corresponding EEG response. Theoretically, it is the sum of hit rates (true positive  
356 rates) for all labels, and corresponds to the diagonal of the confusion matrix. However, a deeper  
357 insight into model performance can be obtained when, in addition to the detection accuracy for a  
358 given input class, one also considers the probability of misclassification of inputs from this class. To  
359 investigate this, we estimated the off-diagonal elements of the confusion matrix. This allowed us to

360 infer which classes are most likely to be confused by the model – thus providing a means of  
361 understanding how similar the information contained in EEG signals corresponding to different hues  
362 is. The subpanels of **Figure 2C** (see also Supplementary Video V1) show the probability (over time)  
363 with which the model assigns each of the four hue labels to EEG responses elicited by a given input  
364 hue (the input hue is labelled above each subpanel). Thus, each subpanel in **Figure 2C** shows one row  
365 of the confusion matrix. Within a 100-300 ms window, each input hue is only confused with its  
366 proximal pair (red and orange, and green and turquoise), while the prediction probabilities for non-  
367 proximal hues are below chance. This is also reflected in the checkerboard-like pattern observed in  
368 Supplementary Video V1. Furthermore, the model is likely to label EEG responses to non-unique  
369 hues (orange and turquoise) as being elicited by their proximal unique hues (red and green  
370 respectively) with almost equal probability, but not vice-versa. Once again, this suggests that EEG  
371 signals between 100-300 ms carry more robust representations of unique hues compared to non-  
372 unique hues.

373

374 The passive viewing at trial outset was followed by a change in the shape of the stimulus from a circle  
375 to either a square or a diamond at a random time-point 800-1500 ms from stimulus onset (see **Figure**  
376 **1**). The colour of the stimulus was task-irrelevant, and the hypothesis here was that since the observer  
377 will be attending to the stimulus shape, the EEG signal would be qualitatively different between the  
378 passive and shape-change segments. This would, in-turn, allow us to test if this difference is reflected  
379 in the ability of the model to classify hue information in the signal. It has been argued that colour-  
380 related activations should still be observed as long as the hue remains unattended and task-irrelevant  
381 (Forder et al., 2017b). To test this hypothesis, we trained tECOC models on the epochs defined by the  
382 shape-change event. As expected, the two segments were found to elicit activity which differed  
383 significantly both in the sequence of ERP peaks as well as topography (**Figure 3A**). However, despite  
384 this difference, we were able to perform hue detection during the shape-change segment with an  
385 accuracy very similar to the passive viewing segment – both in terms of peak decoding score and its  
386 time-course (**Figure 3B**). This suggests that the temporal structure of the hue-related information in



387 EEG signals is indeed robust to changes in the task (as long as the hue itself remains task-irrelevant),  
388 and can be extracted even when the observer is engaged in a concurrent shape discrimination task.

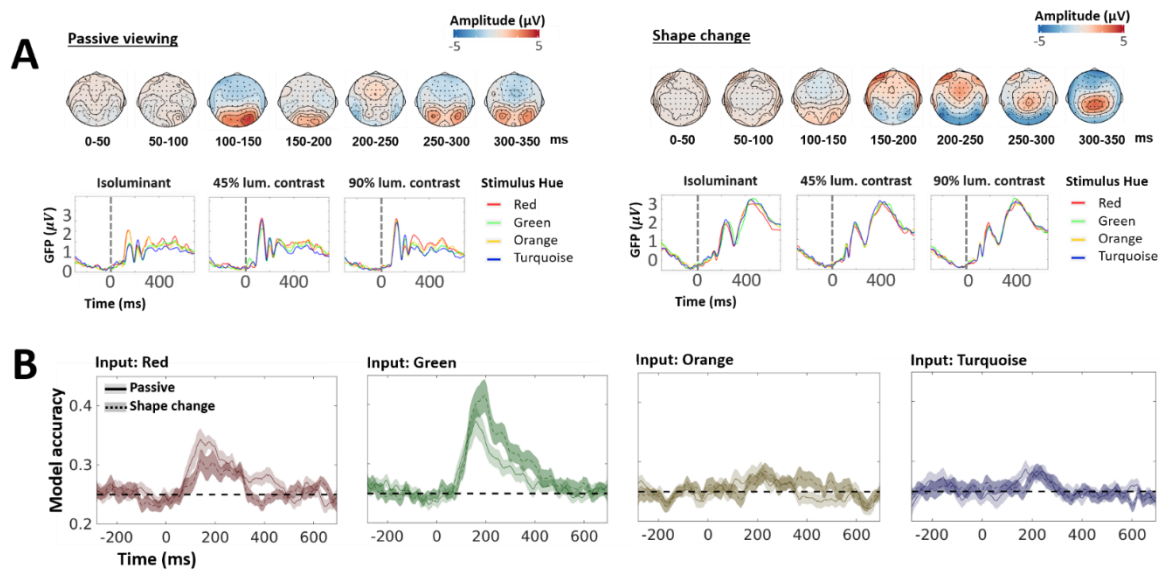

389

390 **Figure 3:** Decoding performance for active and passive tasks is very similar, despite large differences in  
391 stimulus-evoked activity. **A.** Global field power (GFP). The left side of the panel shows the topographies and  
392 the GFPs for stimulus onset. The hues are colour-coded (unique green is shown in green, red in red, etc.), and  
393 each panel shows the GFP for one luminance-contrast condition. The stimulus onset is marked by a dashed line  
394 at 0 abscissa. The right side of the panel shows the same for the shape-change event. **B.** Robustness to task.  
395 Separate models were trained using passive viewing and shape-change segments. Each subpanel shows the  
396 accuracy of the two models for one particular input hue (e.g., the leftmost panel shows the model accuracy when  
397 EEG responses to red stimuli were used as inputs). The performance of the passive-segment model is shown  
398 using the same colours and symbols as **Figure 2A**, while the shape-change model is shown using a dashed line  
399 for observer mean and darker shading for  $\pm 1$  standard-error of the mean.

400

401

### 402 **Luminance signals interfere with chromatic information in occipital ERPs**

403 Next, we investigated whether hue identity could still be decoded when both chromatic and luminance  
404 information was present in the EEG signal. A chromatic-driven ERP is characterised by a robust  
405 negative deflection at about 120-220 ms after stimulus onset (Murray et al., 1987; Berninger et al.,  
406 1989; Tobimatsu et al., 1996), but this response is significantly altered by the addition of luminance  
407 contrast (Rabin et al., 1994). According to normative work by Rabin et al. (1994), while observer

408 isoluminance drives ERPs in a manner closely resembling nominal isoluminance, any substantial  
409 changes in luminance contrast have been found to result in highly dissimilar waveforms. To assess if  
410 this would also impact classifier performance, we constructed a model that evaluated how decoding  
411 performance was affected when the model was trained on inputs which differ not only in hue but also  
412 luminance-contrast. We trained tECOC classifiers for each observer using 12 labels, corresponding to  
413 three different luminance-contrast levels for each of the four hues. In **Figure 4**, we present the  
414 performance of our model in a manner similar to **Figure 2C**. Each panel is one row of the confusion  
415 matrix, i.e., given the EEG signals for an input stimulus, it shows the prediction probabilities for all  
416 12 labels. The hue of the input is denoted by the row (labelled in the right margin) and its luminance-  
417 contrast by the column (labelled on top). The same colours as **Figure 2C** are used to denote the four  
418 hues. In addition, for each hue, we also use two additional brightness levels to represent the two  
419 luminance contrast ratios (thus, for a given hue, isoluminant stimulus is the least bright, 45%  
420 luminance contrast is brighter, and 90% luminance contrast is the brightest). We find that while  
421 isoluminant signals can indeed be classified 100-300 ms after stimulus onset (left column), addition of  
422 luminance information disrupts the model performance for all hues (middle and right columns).  
423 Furthermore, we find that the classifier does not confuse isoluminant and non-isoluminant stimuli.  
424 This suggests that in contrast to a change in stimulus-shape where the temporal structure of hue-  
425 related information was preserved, addition of luminance-contrast to the stimulus disrupts the  
426 temporal patterns which encode hue-information.

427

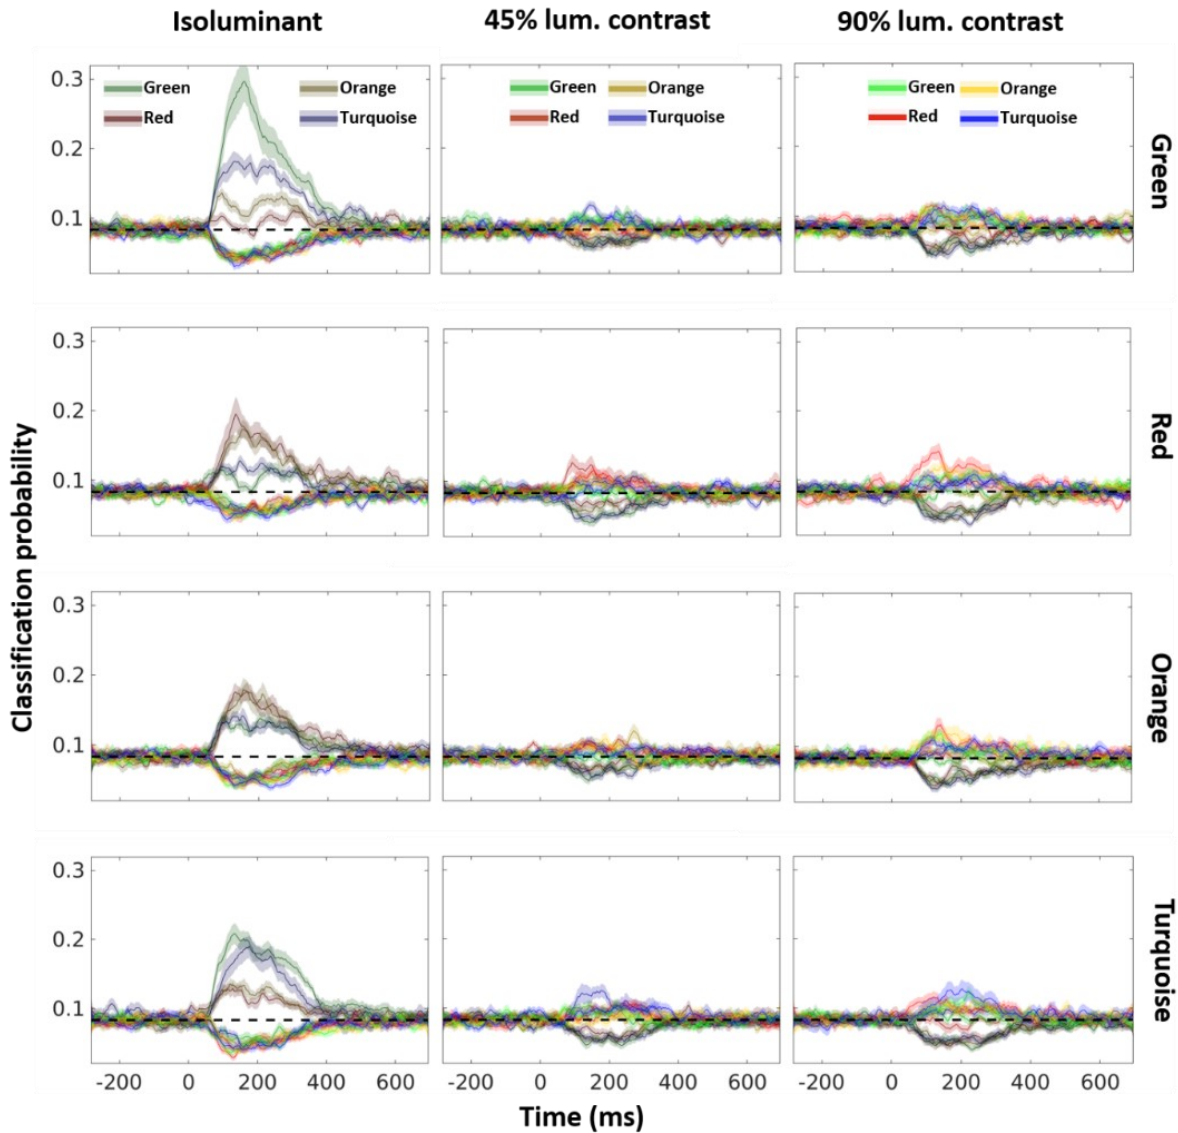

441 luminance conditions (**Figure 5A**) can be decoded to above-chance levels. An examination of the  
442 misclassification patterns of the model (**Figure 5B**) further revealed that while isoluminant stimuli are  
443 robustly classified, the non-isoluminant conditions are more likely to be confounded with one another.

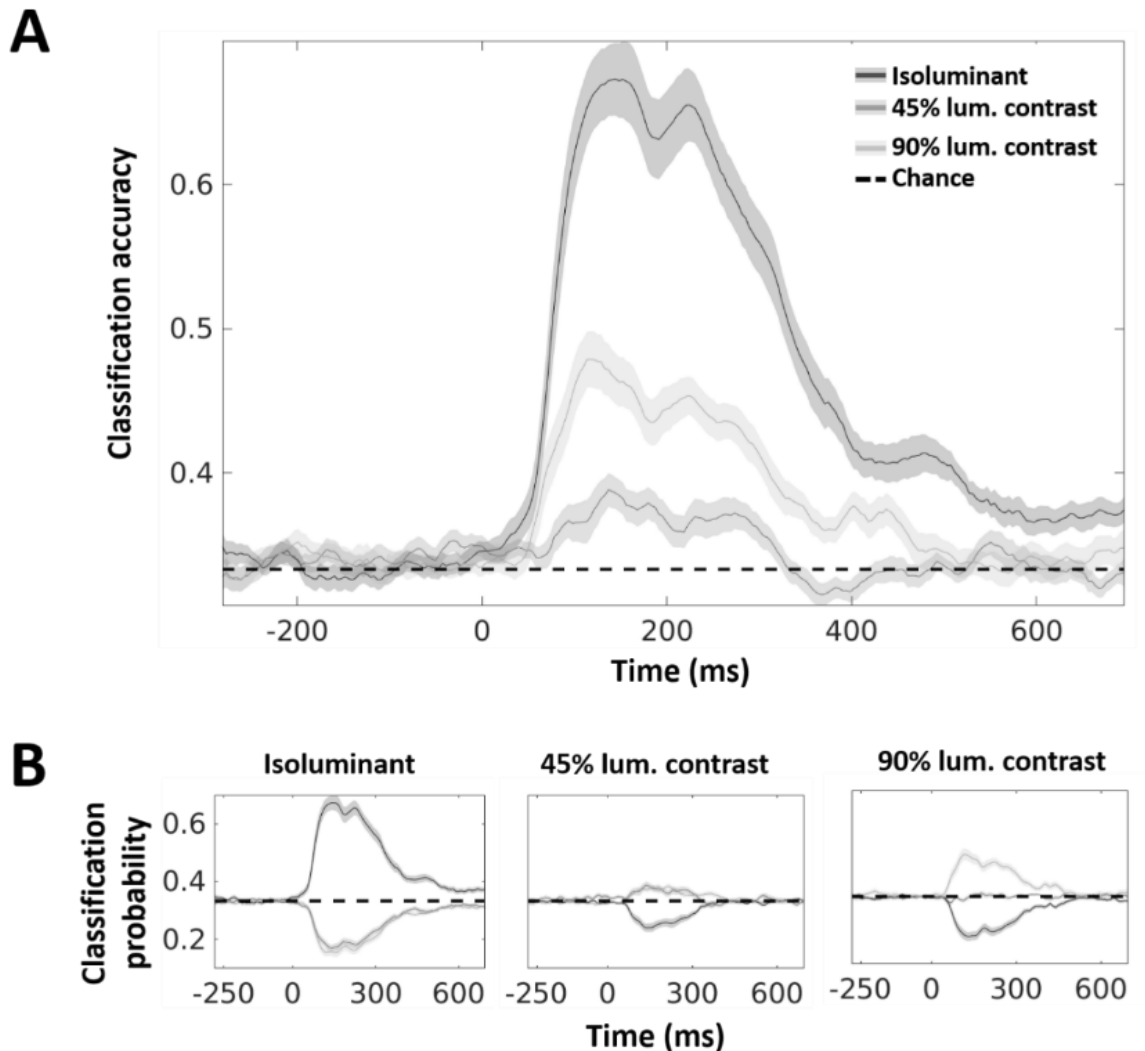

444

445 **Figure 5:** Luminance decoding from EEG signals. A. Mean classification accuracy. This panel shows the  
446 performance of the model in correctly identifying the luminance contrast of the stimuli (model accuracy). Each  
447 line shows the accuracy for one condition, with dark grey coding for the isoluminant condition, medium grey  
448 coding for 45% luminance contrast, and light grey coding for 90% luminance contrast (coding of luminance  
449 contrast using lightness is used throughout the article). The shaded area around the lines shows  $\pm 1$  standard  
450 error of the mean. Chance performance is shown by the dashed line. B. Misclassification probabilities. Each  
451 subpanel shows one row of the confusion matrix analogous to **Figure 2C**. The left panel shows classification  
452 probabilities for the three luminance conditions when isoluminant stimulus is presented to the classifier.  
453 Similarly, the middle and right panels show prediction probabilities when 45% and 90% luminance contrast  
454 inputs are presented to the classifier.

455 Stimuli with 45% luminance contrast have an above-chance probability of being misclassified as 90%  
456 luminance contrast (and vice-versa). However, this effect is not strictly symmetric, with 90%  
457 luminance contrast being easier to detect compared to the 45% contrast. Thus, under non-isoluminant  
458 conditions, not only are the hue-driven patterns difficult to detect, but they seem to be progressively  
459 overridden by luminance-contrast-driven patterns. To ensure that this effect was driven by luminance,  
460 and not by the chromatic content of the stimuli, we set up separate models for each hue, and were able  
461 to confirm that the effect was indeed independent of the chromatic content of the stimulus. For each  
462 hue, the isoluminant stimuli were robustly classified (Supplementary **Figure S2**, leftmost column),  
463 while the non-isoluminant conditions produced similar but asymmetric prediction scores  
464 (Supplementary **Figure S2**, middle and right columns).

465

## 466 **Interim Discussion**

467 Our findings are in line with Sutterer et al (2021) who recently reported that both colour and  
468 luminance content can be successfully decoded from EEG signals. Hermann et al (2021) investigated  
469 decoding of hue or luminance polarity from MEG signals and found that generalising luminance  
470 polarity across hue works better than generalising hue across polarity. This is consistent with our own  
471 findings that decoding of hue is strongly affected by the addition of luminance contrast. Unlike these  
472 studies, where only stimuli that combine colour and luminance contrast were used, we also included  
473 stimuli that were isoluminant with the background. We found that decoding of hue from such  
474 nominally isoluminant stimuli is much more efficient. While it appears that decoding was superior for  
475 unique compared to intermediate hues, Hermann et al (2021) also report higher decoding efficiency  
476 for red and green compared to orange and blue, although such an asymmetry is not present in the  
477 decoding study by Hajonides et al. (2021). Hermann and colleagues suggest that poorer decoding for  
478 orange and blue may be due to their alignment with the daylight locus, causing a less consistent signal  
479 in the presence of luminance. To disambiguate if unique or intermediate hue status drives a more  
480 robust neural signal irrespective of daylight locus alignment, it would be necessary to use a unique

481 hue that is also more aligned with the daylight locus, such as yellow or blue. Thus, in our next  
482 experiment, we decided to replace red with yellow, which would allow us to maintain the same  
483 proximity structure (red/orange, green/turquoise) but eliminate the potential daylight locus confound.

484 Finally, the stimulus set in Experiment 1 was designed to investigate whether unique hues have more  
485 robust EEG representations. To achieve this, we chose unique and non-unique hues that were  
486 maximally distant in a perceptual space – red and green, orange and turquoise (see details of the  
487 stimulus set in Methods). As already reported by Rosenthal et al (2021) and Hermann et al (2021),  
488 inter-hue differences in decoding efficiency manifest even between such evenly spaced colours. To  
489 better understand the non-uniformity of this neurometric colour space, in our next experiment we  
490 aimed to investigate the structure of the decoding manifold by introducing proximal neighbours,  
491 clockwise and counterclockwise to each hue. Decoding colours in such small and large  
492 neighbourhoods allows us to understand how perceptual notions of hue-difference map to the EEG-  
493 derived neurometric space.

494

## 495 **Experiment 2: Decoding over small and large perceptual hue differences**

496 In Experiment 1 we showed superior decoding performance for unique hues compared to intermediate  
497 hues, suggesting a robust neural representation for the former. In Experiment 2, this hypothesis was  
498 further critically tested by using small and large hue differences. Our aim was to re-examine decoding  
499 of nominally isoluminant unique and intermediate hues with a slightly modified hue set (see Interim  
500 Discussion above) and to extend it by decoding local clusters of stimuli around each of these hues.  
501 First, we measured individual settings for unique (yellow and green) and non-unique (orange and  
502 turquoise) hues for each observer. Next, we made EEG measurements in a task analogous to  
503 Experiment 1 using, for each observer, a stimulus set consisting of their subjective settings for the  
504 four hues (denoted as the = configuration), and two sets of stimuli generated by rotating the subjective  
505 settings by  $\pm 10^\circ$  in CIELAB colour space (denoted as the + and – configurations respectively) –  
506 leading to a total of 12 stimuli (4 hue-clusters and 3 rotational-configurations, see Supplementary

507 **Figure S5D**). The individual hue settings were as follows (means and SEs): yellow  $101^\circ \pm 2^\circ$ , orange  
508  $61^\circ \pm 3^\circ$ , green  $153^\circ \pm 3^\circ$  and turquoise  $198^\circ \pm 3^\circ$ .

509 In the shape discrimination task, grand mean accuracy was  $96\% \pm 1\%$  SE (see Supplementary **Figure**  
510 **S5A**) and reaction times were  $706 \pm 61$  ms (See Supplementary **Figure S5B**). Response-time data was  
511 analysed with a 4x3 repeated measures ANOVA (4 hues vs. 3 rotational configurations, i.e., -, + and =  
512 sets), which yielded a significant main effect of hue ( $F(1.77, 26.5) = 5.25, p = .01, \eta^2 = 0.26$ ) and an  
513 interaction with the rotational configuration ( $F(2.16, 32.49) = 5.08, p = .01, \eta^2 = 0.25$ ) while the  
514 effect of the rotation itself was not significant ( $F(1.79, 26.99) = 0.72, p = 0.48, \eta^2 = 0.05$ ). The  
515 interaction was deconstructed by separate repeated measures ANOVAs at each hue: for yellow, there  
516 was a significant effect of rotation ( $F(1.36, 20.48) = 6.23, p = .01, \eta^2 = 0.29$ ) driven by slower RTs  
517 for the individual hue setting vs.  $10^\circ$  clockwise setting ( $p = 0.006$ ). For green, there was also a  
518 significant effect ( $F(1.58, 23.74) = 6.76, p = .007, \eta^2 = 0.31$ ) driven by faster RTs for the individual  
519 hue setting vs.  $10^\circ$  clockwise setting ( $p = .04$ ) as well as vs.  $10^\circ$  counterclockwise setting ( $p = .005$ );  
520 no differences were found for orange ( $p = .22$ ) and for turquoise ( $p = .11$ ). Taken together, we can see  
521 that only for unique hues (yellow and green) the responses to individual hue settings (= configuration)  
522 seem to be different from responses to  $\pm 10^\circ$  rotated hues (i.e., - and + configurations). However, the  
523 direction of the effect was opposite for the two hues – while participant responded slower to their  
524 individual yellow setting, they responded faster to their individual green setting.

525 For the Categorical Rating task, the average ratings and their SEs were as follows: individual yellow  
526  $5.62 \pm 0.6$ ;  $-15^\circ$  yellow  $5.75 \pm 0.57$ ;  $+15^\circ$  yellow  $2.56 \pm 0.35$ ; individual green  $6.93 \pm 0.26$ ;  $-15^\circ$  green  
527  $7.93 \pm 0.17$ ;  $+15^\circ$  green  $3.87 \pm 0.35$ ; individual orange  $6.37 \pm 0.36$ ;  $-15^\circ$  orange  $3.93 \pm 0.48$ ;  $+15^\circ$   
528 orange  $7.25 \pm 0.48$ ; individual turquoise  $5.68 \pm 0.53$ ;  $-15^\circ$  turquoise  $7.43 \pm 0.53$ ;  $+15^\circ$  turquoise  $3.18$   
529  $\pm 0.5$  (See Supplementary **Figure S5C**).

530



531 **Decoding over large hue differences is predicted by hue angles**

532 For each observer, we trained tECOC models over all stimuli: the four hue settings (= group), and the  
533 eight stimuli generated by  $\pm 10^\circ$  rotations of each of these settings (+ and - groups respectively).  
534 Using the classification results, we generated a time-series of dissimilarity matrices (see Methods for  
535 details) and found that the stimulus representations were highly dissimilar in a 100-400 ms window  
536 after stimulus onset (**Figure 6A**). Similarly, we also calculated a perceptual dissimilarity measure by  
537 using differences in hue angles of the stimuli in CIELAB space. As expected, perceptual dissimilarity  
538 increases as one moves away from a given reference stimulus (**Figure 6B**). Using rank-correlation  
539 analysis, we found a significant ( $p < 0.001$ ) increase in Kendall's tau statistic in a 100-400 ms range  
540 post-stimulus (**Figure 6D**), suggesting that perceptual distances are indeed correlated with decoding  
541 output. This was also reflected in stable mean and peak dissimilarities during the period of significant  
542 correlation (**Figure 6C**).

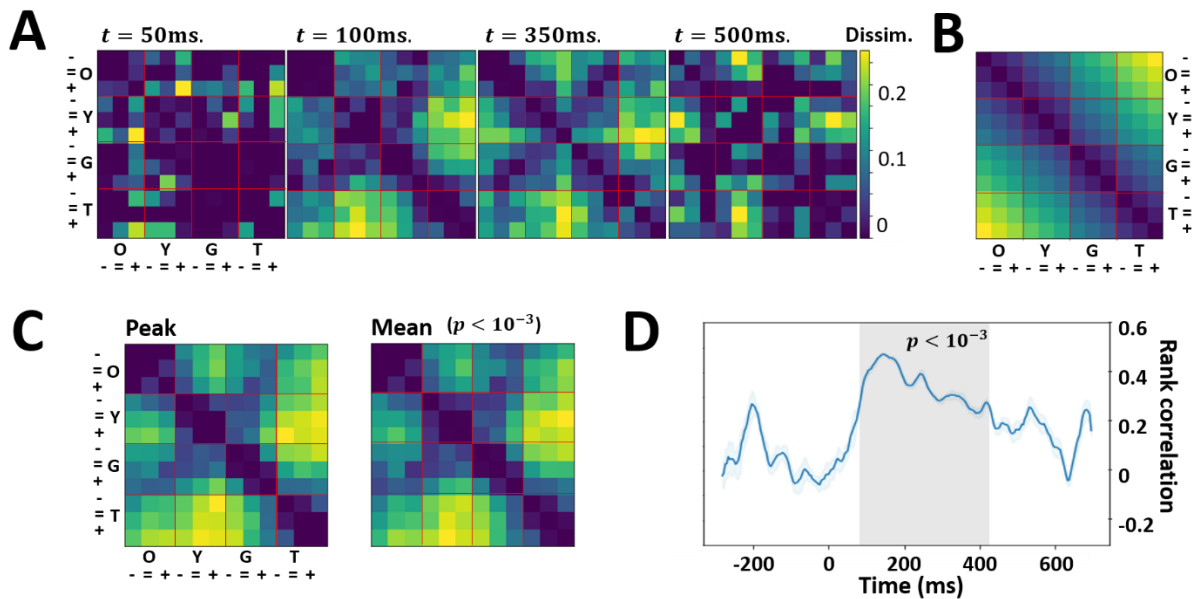

543

544 **Figure 6:** Isomorphism between representational and perceptual spaces for large distances. **A.** Dissimilarity in  
545 classifier outputs. tECOC models were trained to classify twelve colours from their EEG responses. The colours  
546 sampled four clusters along the hue circle corresponding to orange (O), yellow (Y), green (G), and turquoise  
547 (T), with each cluster consisting of settings made by the observer in a psychophysical experiment (=), and  
548 colours sampled  $10^\circ$  clockwise (-) and anti-clockwise (+) with respect to each setting. Each panel shows a  
549 dissimilarity matrix derived from classifier output. The panels show the dissimilarity 50, 100, 350, and 500 ms  
550 after stimulus onset. **B.** Dissimilarity in perceptual space. Hue angles of the 12 stimuli (same as panel A) were



551 used to estimate dissimilarity in the perceptual CIELAB space. **C.** Peak and Mean Dissimilarity. The left panel  
552 (labelled Peak) shows the dissimilarity is classifier output at the time-point where rank-correlation (panel **D**)  
553 with perceptual dissimilarity peaks, and the right panel (labelled Mean) shows the average dissimilarity over the  
554 period where the correlation is statistically significant. **D.** Representational similarity. Rank-correlation (left  
555 panel) between perceptual and classification dissimilarities using Kendall's tau statistic. Grey background  
556 indicates statistical significance ( $p < 0.001$ ), and the statistic peaks at  $t = 145$  ms.

557

### 558 **Local distortions in hue decoding**

559 Next, we posed the question: is the perceptual robustness of unique hues reflected in the structure of  
560 the decoding space around their respective representations? To answer this question, we trained 4  
561 tECOC models – one in the neighbourhood of each of the four individually measured hues. Each  
562 model was trained to classify EEG signals into one of three labels: subjective setting (=), stimuli  $10^\circ$   
563 clockwise (+) to the subjective settings, and stimuli  $10^\circ$  counter-clockwise (-) from the subjective  
564 settings. In **Figure 7A** we show the results for the four models, one model per row. Each subpanel is a  
565 row in the corresponding confusion matrix, with the test stimulus indicated on top – for instance, the  
566 first panel shows the predictions of the model trained in the yellow neighbourhood, when stimuli  $10^\circ$   
567 counter-clockwise from subjective yellow settings are presented to it.

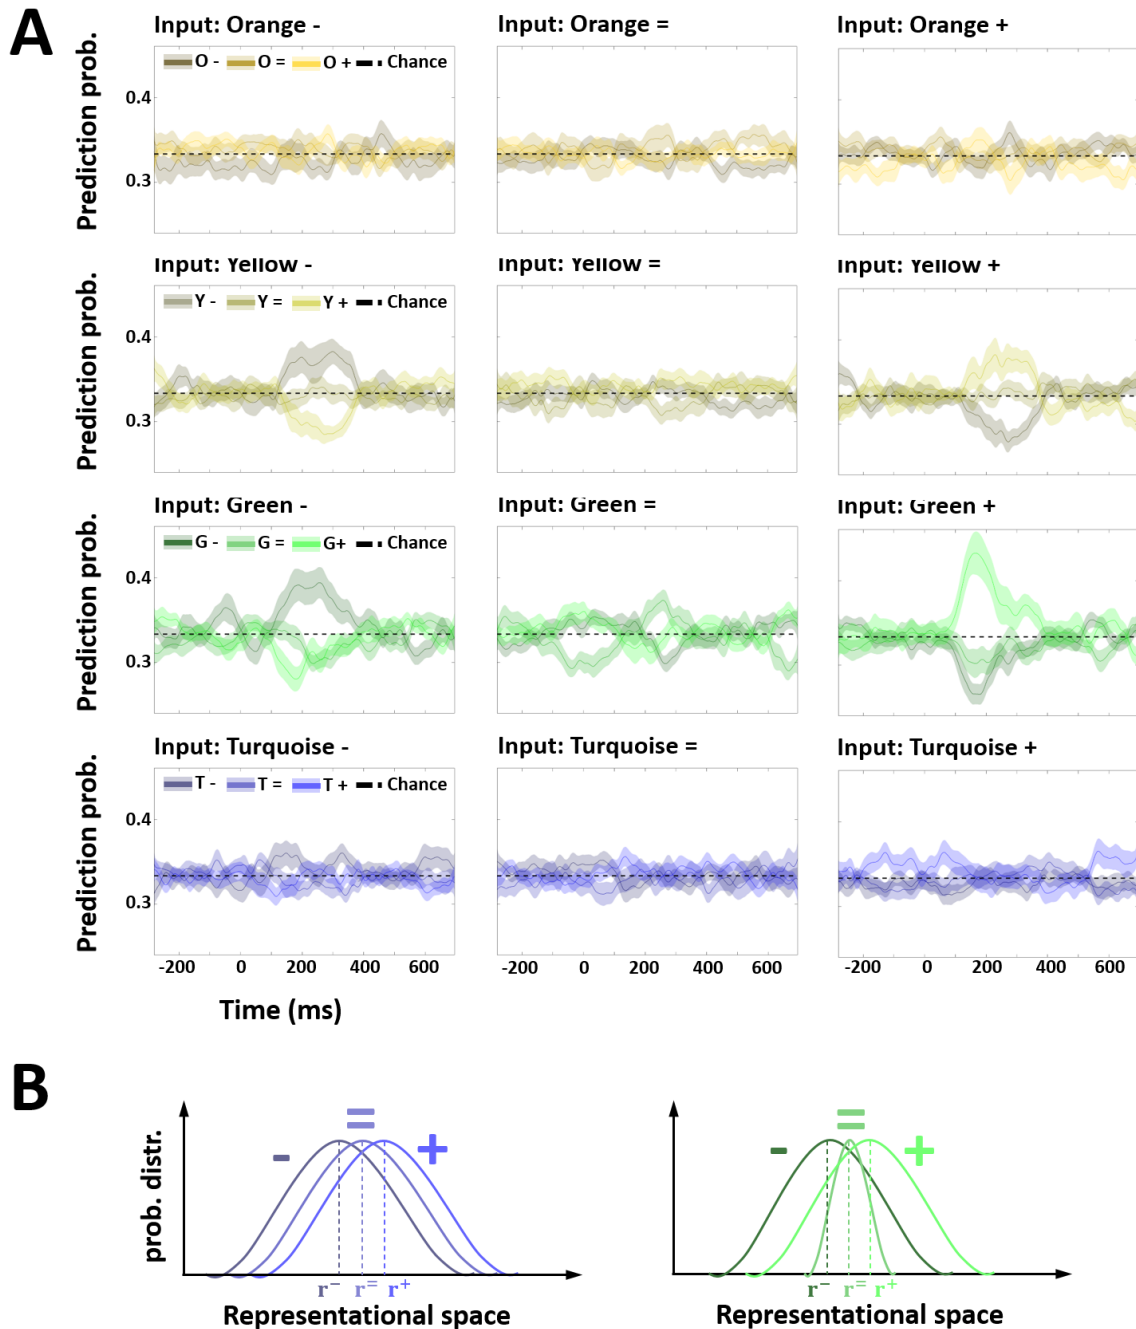

568

569 **Figure 7:** Local distortions in representational space. **A.** Decoding within colour clusters. tECOC models were  
 570 trained on clusters around the subjective settings for unique (yellow: Y, green: G) and non-unique (Orange: O,  
 571 Turquoise: T) hues. Each cluster consisted of three groups: subjective observer settings (=), and two groups  
 572 derived from 10° clockwise (+) and counter-clockwise (-) rotations of the subjective settings in CIELAB space.  
 573 Each row shows a model trained on a different hue (top row: yellow, second row: green, etc.), with subpanels  
 574 showing rows of the corresponding confusion matrices. The input stimulus for each row of the confusion matrix  
 575 is labelled on top. **B.** Effect of variability in the internal neural representation  $\mathbf{r}$  on decoding. The panel on the  
 576 left shows a configuration of the distributions for the three groups (-, = and +) which can lead to poor decoding  
 577 scores such as those observed for non-unique hues. The distributions overlap, and the distance between the

578 distributions is too low to allow for proper discrimination using a linear boundary. The panel on the right shows  
579 how a relative decrease in the variability of one group (subjective settings for unique hues, =) can lead to better  
580 decoding for the other two (- and +).

581

582 We found that the three groups (subjective settings, and the  $\pm 10^\circ$  rotations) cannot be decoded in  
583 non-unique hues (**Figure 7A**, first and fourth rows). However, for unique hues (**Figure 7A**, second  
584 and third row), the rotated groups (first and third columns) can be decoded, while the subjective  
585 settings (second column) cannot. This result suggests that EEG representations of unique hues may  
586 have lower variability compared to non-unique hues. Such fluctuations in local variability in the  
587 representational space can create distortions in the decoding measure, allowing for better decoding of  
588 the flanking distributions (one such scenario is illustrated in **Figure 7B**). Note that in the perceptually  
589 uniform CIELAB space the three groups, by design, had equivalent relative distributions (- and +  
590 were simply mean-shifted copies of =).

591

## 592 **Discussion**

593 Our first finding is that - under isoluminant conditions - EEG responses to unique hues show more  
594 distinct patterns compared to non-unique hues, and that these patterns are stable during both passive  
595 viewing (**Figure 2**) and active task-engagement (**Figure 3**). We can also reach certain conclusions  
596 about the underlying neural processes from the time-course of decoding performance. A 100-300 ms  
597 decoding window is consistent with the idea that the performance of the model could be driven by  
598 both perceptual and post-perceptual contributions (Forder et al., 2017b). This is supported by the fact  
599 that the decoding performance steadily rises before peaking between 150-200 ms after stimulus onset,  
600 a time-window where EEG signals begin reflecting post-visual evaluative processing (VanRullen and  
601 Thorpe, 2001), including colour categorisation (Fonteneau and Davidoff, 2007). The chromatic visual  
602 evoked potential (cVEP), which reflects the activation of colour sensitive neurons in early visual  
603 cortices, also remains maximal in the same time window (Nunez et al., 2018). However, a high-level  
604 interpretation of the decoding on the basis of the categorical status of the stimulus colours is unlikely.

605 Categorical representativeness ratings do not follow the pattern observed in the classifier performance  
606 (see Supplementary **Figure S4C**), and seem to rather reflect the relation between the colour sample  
607 and the focal colour. The most parsimonious explanation for the pivots in colour space that drive  
608 asymmetries in decoding around unique hue locations would be that they correspond to hue locations  
609 that are associated with a more robust neural representation, thus making it more easily decodable  
610 from less robustly represented hues.

611

612 Secondly, classification performance for the decoding of hues is diminished when luminance contrast  
613 was added (**Figure 4**). This was not entirely unexpected since luminance contrast is known to have a  
614 strong effect on EEG responses, once luminance contrast is sufficiently strong (Rabin et al., 1994). At  
615 the same time, we found that all luminance conditions **Figure 5** can be decoded to above-chance  
616 levels within the same 100-300 ms window. Thus, under non-isoluminant conditions, not only are the  
617 hue-driven patterns more difficult to detect, but they may also be at least partly overridden or replaced  
618 by luminance-contrast or joint-colour-and-luminance-contrast-driven activity. Our findings are  
619 consistent with the idea that hue is most likely to be encoded by neural populations which also encode  
620 luminance. The fact that purely chromatic-tuned cells in the visual cortex are known to be in a  
621 minority compared to luminance-tuned or luminance-chromaticity tuned cells (Lennie et al., 1990;  
622 Johnson et al., 2001) may partly explain why luminance signals tend to override chromatic  
623 information in EEG recordings. In V1-V3, the neurons are tuned to many intermediate directions,  
624 both in terms of hue and luminance contrast (for a review, see Gegenfurtner and Kiper, 2003). In  
625 higher-level areas of the extra-striate cortex, colour representations become organised in ways that  
626 resemble perceptual colour spaces (Brouwer and Heeger, 2009, 2013). Thus, the decoding in our  
627 study is likely to reflect cumulative effects that build up across these areas. Even though we find more  
628 robust responses for the two unique hues (red and green) compared to the two non-unique hues  
629 (orange and turquoise), decoding is still possible for non-unique hues, implying that there are indeed  
630 multiple hue representations that are being encoded by the brain (see, e.g., Brouwer and Heeger,  
631 2009; Parkes et al., 2009; Zaidi and Conway, 2019).

632

633 Thirdly, we show in Experiment 2, that the geometric structure of this representational space can be  
634 explored by carefully designed experiments. Our results demonstrate that while large distances in the  
635 neural representational space are indeed correlated with perceptual hue differences (**Figure 6**), there  
636 are local anisotropies associated with unique hues (**Figure 7**) which are likely to represent local  
637 changes in signal variability. Such tunings could reflect properties of our environment such as the  
638 statistical regularities in the reflectance spectra of naturally occurring surfaces (Philipona and  
639 O'Regan, 2006). Perhaps this is the reason why the neural reality of perceptual red-green and blue-  
640 yellow hue-opponent mechanisms has proven to be so elusive – it is not a fundamental mechanism  
641 hard-wired into the neural circuitry, but a statistical peak in the tuning of neural populations which  
642 multiplex both colour and luminance information. Its identification is therefore complicated by the  
643 fact that neural populations jointly coding for chromaticity and luminance are likely to show higher  
644 responsiveness to the presence of luminance contrast (Johnson et al., 2001), making hue-specific  
645 signals much harder to detect.

646

647 A growing number of studies investigating population activity analyse EEG and MEG topographical  
648 data by interrogating trajectories in activation manifolds. Our results suggest that the structure of such  
649 manifolds can be highly anisotropic, and that these anisotropies can reflect perceptual measurables. In  
650 the case of hue perception, it is likely that the local structure of this space is reflected in quasi-  
651 invariants such as the so-called unique hue percepts. Now that neurometric mapping of hue spaces has  
652 been established by numerous studies (Hajonides et al., 2021; Hermann et al., 2021; Rosenthal et al.,  
653 2021), this study marks a first hypothesis-based exploration of these maps and shows that unique hues  
654 represent local anisotropies in cortical hue-representations.

655

656

657 **Open practices**

658 The decoding scripts have been packaged as the tECOC toolbox, which has been made available as a  
659 public git repository [here](#). The EEG and behavioural data from both experiments will be shared on the  
660 Open Science Framework website.

661

## 662 **Bibliography**

- 663 Berninger TA, Arden GB, Hogg CR, Frumkes T (1989) Separable evoked retinal and cortical  
664 potentials from each major visual pathway: preliminary results. *Br J Ophthalmol* 73:502–511.
- 665 Bohon KS, Hermann KL, Hansen T, Conway BR (2016) Representation of Perceptual Color Space in  
666 Macaque Posterior Inferior Temporal Cortex (the V4 Complex). *eNeuro* 3 Available at:  
667 <https://www.eneuro.org/content/3/4/ENEURO.0039-16.2016> [Accessed September 17, 2019].
- 668 Brouwer GJ, Heeger DJ (2009) Decoding and Reconstructing Color from Responses in Human Visual  
669 Cortex. *J Neurosci* 29:13992 LP – 14003.
- 670 Brouwer GJ, Heeger DJ (2013) Categorical Clustering of the Neural Representation of Color. *J*  
671 *Neurosci* 33:15454–15465.
- 672 Conway B, Stoughton C (2009) Response: Towards a neural representation for unique hues. *Curr Biol*  
673 19:R442–R443.
- 674 De Valois R, De Valois K (1993) A multi-stage color model. *Vision Res* 33:1053–1065.
- 675 Delorme A, Makeig S (2004) EEGLAB: an open source toolbox for analysis of single-trial EEG  
676 dynamics including independent component analysis. *J Neurosci Methods* 134:9–21.
- 677 Fonteneau E, Davidoff J (2007) Neural correlates of colour categories. *NeuroReport* 18:1323.
- 678 Forder L, Bosten J, He X, Franklin A (2017a) A neural signature of the unique hues. *Sci Rep* 7:42364.
- 679 Forder L, He X, Franklin A (2017b) Colour categories are reflected in sensory stages of colour  
680 perception when stimulus issues are resolved. *PLOS ONE* 12:e0178097.
- 681 Gegenfurtner KR, Kiper DC (2003) Color Vision. *Annu Rev Neurosci* 26:181–206.
- 682 Hajonides JE, Nobre AC, van Ede F, Stokes MG (2021) Decoding visual colour from scalp  
683 electroencephalography measurements. *NeuroImage*:118030.
- 684 Hering E (1920) *Outlines of a Theory of the Light Sense*. Translated from German by L. Hurvich &  
685 D. Jameson 1964. Cambridge: Harvard Univ. Press.
- 686 Hermann KL, Singh SR, Rosenthal IA, Pantazis D, Conway BR (2021) Temporal dynamics of the  
687 neural representation of hue and luminance contrast. *bioRxiv*:2020.06.17.155713.
- 688 Jameson D, Hurvich L (1964) Theory of brightness and color contrast in human vision. *Vision Res*  
689 4:135–154.
- 690 Jazayeri M, Afraz A (2017) Navigating the Neural Space in Search of the Neural Code. *Neuron*  
691 93:1003–1014.
- 692 Johnson E, Hawken M, Shapley R (2001) The spatial transformation of color in the primary visual  
693 cortex of the macaque monkey. *Nat Neurosci* 4:409–416.
- 694 Johnson K (2000) Neural Coding. *Neuron* 26:563–566.
- 695 Junghöfer M, Elbert T, Tucker DM, Rockstroh B (2000) Statistical control of artifacts in dense array  
696 EEG/MEG studies. *Psychophysiology* 37:523–532.

- 697 Kaneshiro B, Guimaraes MP, Kim H-S, Norcia AM, Suppes P (2015) A Representational Similarity  
698 Analysis of the Dynamics of Object Processing Using Single-Trial EEG Classification. PLOS  
699 ONE 10:e0135697.
- 700 Knoblauch K, Bieber ML, Werner JS (1998) M- and L-cones in early infancy: I. VEP responses to  
701 receptor-isolating stimuli at 4- and 8-weeks of age. *Vision Res* 38:1753–1764.
- 702 Lee BB, Martin PR, Grünert U (2010) Retinal connectivity and primate vision. *Prog Retin Eye Res*  
703 29:622–639.
- 704 Lennie P, Krauskopf J, Sclar G (1990) Chromatic mechanisms in striate cortex of macaque. *J*  
705 *Neurosci* 10:649–669.
- 706 Maris E (2012) Statistical testing in electrophysiological studies. *Psychophysiology* 49:549–565.
- 707 Mognon A, Jovicich J, Bruzzone L, Buiatti M (2011) ADJUST: An automatic EEG artifact detector  
708 based on the joint use of spatial and temporal features. *Psychophysiology* 48:229–240.
- 709 Mollon J (2009) A neural basis for unique hues? *Curr Biol* 19:R441-2; author reply R442-3.
- 710 Murray I, Parry N, Carden D, Kulikowski J (1987) Human visual evoked potentials to chromatic and  
711 achromatic gratings. *Clin Vis Sci* 1:231–244.
- 712 Nolan H, Whelan R, Reilly RB (2010) FASTER: Fully Automated Statistical Thresholding for EEG  
713 artifact Rejection. *J Neurosci Methods* 192:152–162.
- 714 Nunez V, Shapley RM, Gordon J (2017) Nonlinear dynamics of cortical responses to color in the  
715 human cVEP. *J Vis* 17:9.
- 716 Nunez V, Shapley RM, Gordon J (2018) Cortical Double-Opponent Cells in Color Perception:  
717 Perceptual Scaling and Chromatic Visual Evoked Potentials. *-Percept* 9:2041669517752715.
- 718 Parkes LM, Marsman J-BC, Oxley DC, Goulermas JY, Wuerger SM (2009) Multivoxel fMRI  
719 analysis of color tuning in human primary visual cortex. *J Vis* 9:1–1.
- 720 Philipona D, O'Regan K (2006) Color naming, unique hues, and hue cancellation predicted from  
721 singularities in reflection properties. *Vis Neurosci* 23:331–339.
- 722 Rabin J, Switkes E, Crognale M, Schneck ME, Adams AJ (1994) Visual evoked potentials in three-  
723 dimensional color space: Correlates of spatio-chromatic processing. *Vision Res* 34:2657–  
724 2671.
- 725 Regan B, Reffin J, Mollon J (1994) Luminance Noise and the Rapid-Determination of Discrimination  
726 Ellipses in Color Deficiency. *Vision Res* 34:1279–1299.
- 727 Ritchie JB, Kaplan DM, Klein C (2019) Decoding the Brain: Neural Representation and the Limits of  
728 Multivariate Pattern Analysis in Cognitive Neuroscience. *Br J Philos Sci* 70:581–607.
- 729 Rosenthal IA, Singh SR, Hermann KL, Pantazis D, Conway BR (2021) Color Space Geometry  
730 Uncovered with Magnetoencephalography. *Curr Biol* 31:515-526.e5.
- 731 Schanda J (2016) CIE  $u'$ ,  $v'$  Uniform Chromaticity Scale Diagram and CIELUV Color Space. In:  
732 *Encyclopedia of Color Science and Technology*, 1st ed. New York, New York, USA:  
733 Springer-Verlag.



- 734 Shepard RN (1958) Stimulus and response generalization: Deduction of the generalization gradient  
735 from a trace model. *Psychol Rev* 65:242–256.
- 736 Stoughton C, Conway B (2008) Neural basis for unique hues. *Curr Biol* 18:R698-9.
- 737 Sutterer DW, Coia AJ, Sun V, Shevell SK, Awh E (2021) Decoding chromaticity and luminance from  
738 patterns of EEG activity. *Psychophysiology* 58:e13779.
- 739 Tobimatsu S, Tomoda H, Kato M (1996) Human VEPs to isoluminant chromatic and achromatic  
740 sinusoidal gratings: Separation of parvocellular components. *Brain Topogr* 8:241–243.
- 741 VanRullen R, Thorpe S (2001) The Time Course of Visual Processing: From Early Perception to  
742 Decision-Making. *J Cogn Neurosci* 13:454–461.
- 743 Walsh JWT (1958) *Photometry*. Dover Publications.
- 744 Wuerger S, Atkinson P, Cropper S (2005) The cone inputs to the unique-hue mechanisms. *Vision Res*  
745 45:3210–3223.
- 746 Wuerger S, Xiao K (2015) Color vision, opponent theory. In: *Encyclopedia of color science and*  
747 *technology*, pp 1–6. Springer.
- 748 Zaidi Q, Conway B (2019) Steps towards neural decoding of colors. *Curr Opin Behav Sci* 30:169–  
749 177.
- 750

751 **Supplementary Material**

752

753 **S1: Model robustness**

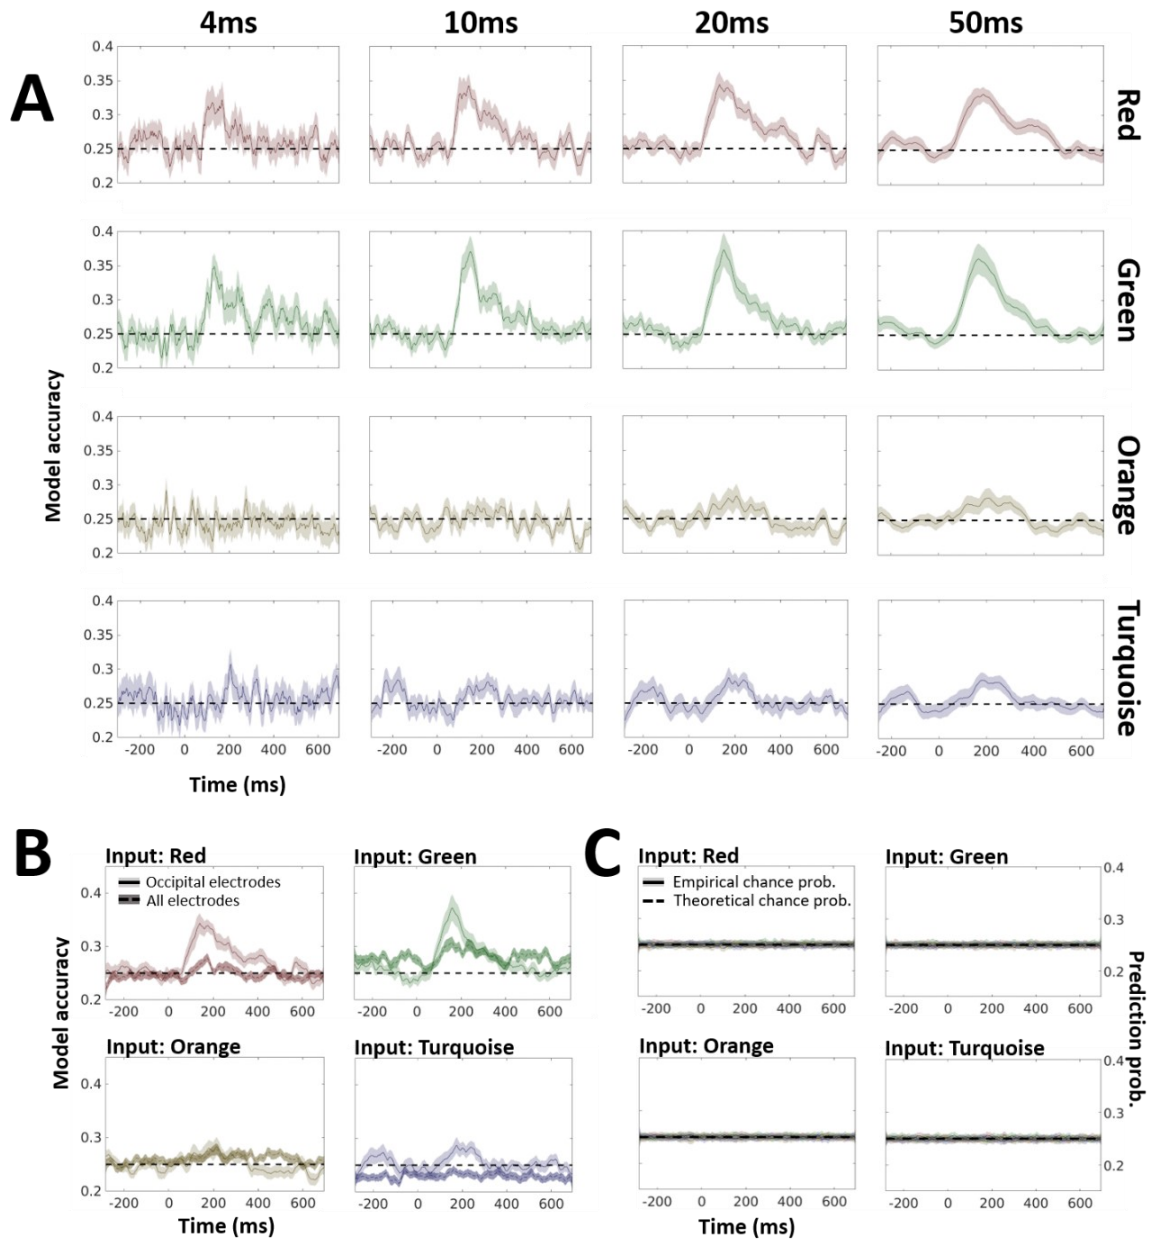

754

755 **Figure S1. Model robustness. A.** Effect of time-window on model performance. Isoluminant stimuli were used  
756 to train models using time-window lengths (see Methods for details) of 4ms, 10ms, 20ms and 50ms. Each  
757 subpanel shows the performance for one such model (columns, labelled on top) in correctly identifying the label  
758 corresponding to the input EEG signal (rows, labelled to the right). The mean accuracy is shown as a solid line,  
759 while the shaded envelope indicates standard error of the mean. A dashed line is used to show the theoretical  
760 chance level. **B.** Decoding using all electrodes. The classification of isoluminant stimuli was performed using all  
761 64 electrodes in a 20ms window. The results (dotted lines with darker envelopes) are shown along with those  
762 obtained by using only the occipital electrodes (solid lines with lighter envelopes). The lines indicate mean  
763 performance while the shaded envelopes indicate standard error of the mean. The theoretical chance level is

764 indicated by dashed horizontal lines. **C.** Comparison of theoretical and empirical chance performance. To  
765 calculate the empirical chance performance, we repeated the experiment shown in **Figure 2** using shuffled  
766 labels for training the model. This ‘permuted’ model was then tested using the same sequence of stimuli used for  
767 testing the unshuffled trained model. Each subpanel in the figure shows the prediction probabilities for one  
768 particular input hue (same analysis as **Figure 2C**).

769

770 Here we demonstrate that our findings are robust to key parameters. First, we show that the time-  
771 window is not a critical parameter for our analysis (panel **A**). The classifier performance does not  
772 change qualitatively with an increase/decrease of the time window length. However, we do observe  
773 increasing noise in the model performance as the window-length approaches the sampling frequency.  
774 Second, we show the classification accuracy for a model which was trained on isoluminant stimuli  
775 using all 64 channels of the EEG signal (panel **B**). As expected, the results show similar trends to  
776 those found in **Figure 2**. The decrease in performance could be due to the added noise in the hue-  
777 related signal from non-occipital sites. Finally, we show the results from a permutation analysis (the  
778 model is trained using a shuffled set of labels and tested with correctly labelled data) showing that  
779 empirical chance-performance is very close to the assumption that all labels are equally likely.

780

781 **S2. Robustness of luminance decoding across hues**

782 In **Figure 5** we show the results of a simulation where EEG signals were used to decode the  
783 luminance of the stimulus. Here, we show results from additional simulations which demonstrate that  
784 this was not driven by any particular hue. Four models were trained to classify the luminance, one for  
785 each of the four hues (rows). For each of the four models, the isoluminant stimuli (left column) were  
786 robustly identified, while the non-isoluminant conditions (middle and right columns) were most likely  
787 to be confused with one another. We also observe the asymmetry between the 90% and 45%  
788 luminance-contrast conditions where the former is easier to detect than the latter.

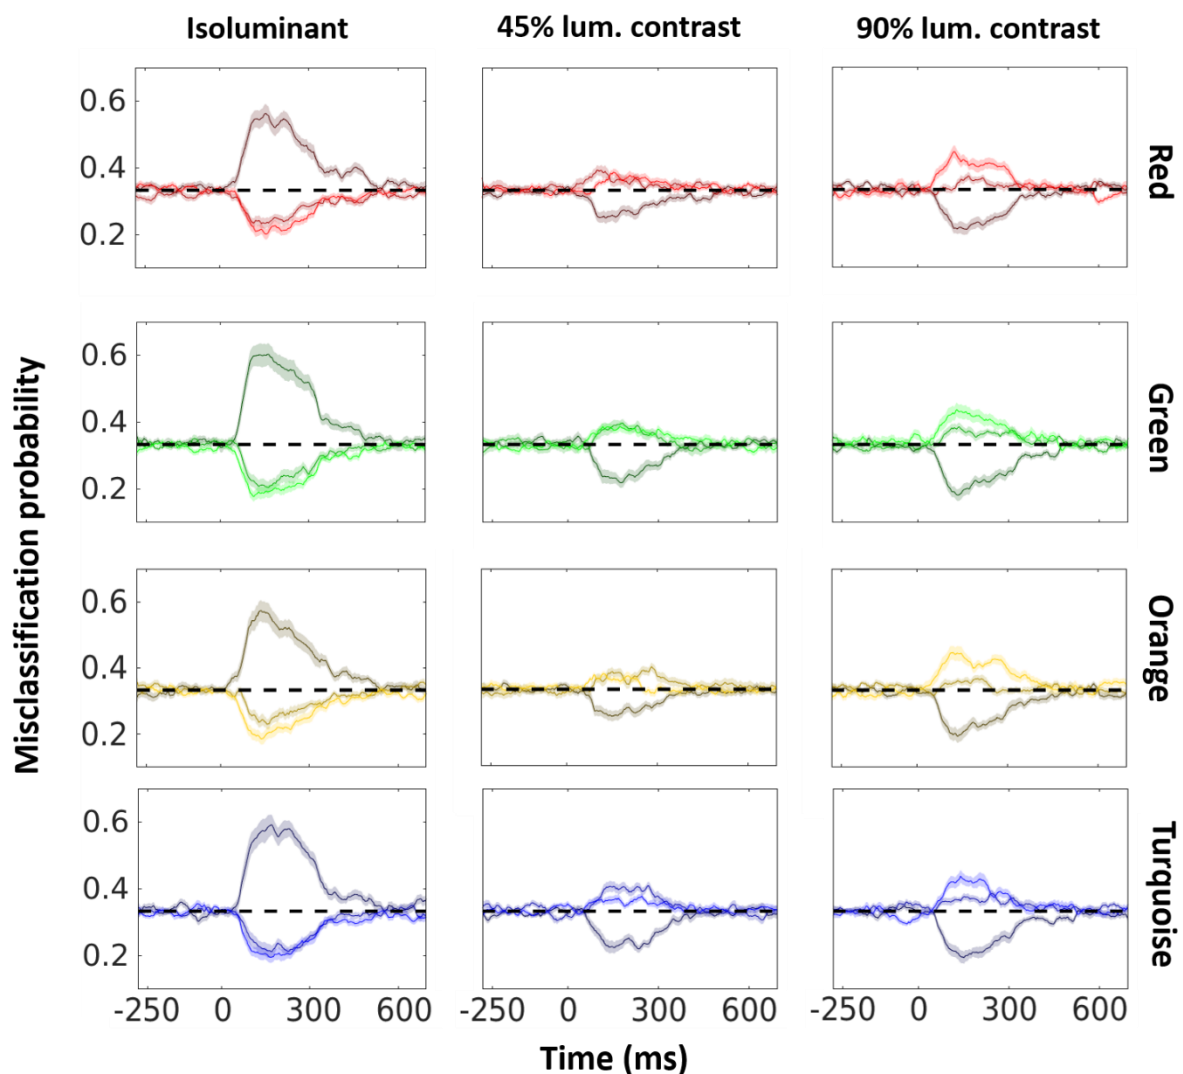

789 **Figure S2.** Luminance classification is robust across hues. ERP responses to individual hues were  
790 used to train hue-specific models for luminance contrast classification. Each row shows the results for

791 one of the four models. In each model (row), the input luminance contrast is denoted by the column  
792 (left: isoluminant, middle: 45%, and right: 90%), and lines in each panel denote the probability of the  
793 predicted label (coded by the lightness of the colour – lowest lightness: isoluminant, medium  
794 lightness: 45%, and high lightness: 90%). The shaded area around the mean represents standard error  
795 of the mean. Dashed lines show the theoretical chance performance for the models.

796

797 **S3: Stimulus coordinates**

798 Here, we show the coordinates of the stimuli for both experiments. Experiment 1 used nominal unique  
799 hues based on a large dataset ( $N = 185$ ) of settings, and non-unique hues which were equidistant  
800 from their respective closest unique hues. Experiment 2 used subjective settings for both unique and  
801 non-unique hues, measured in separate sessions before the EEG recordings. See Methods for details.

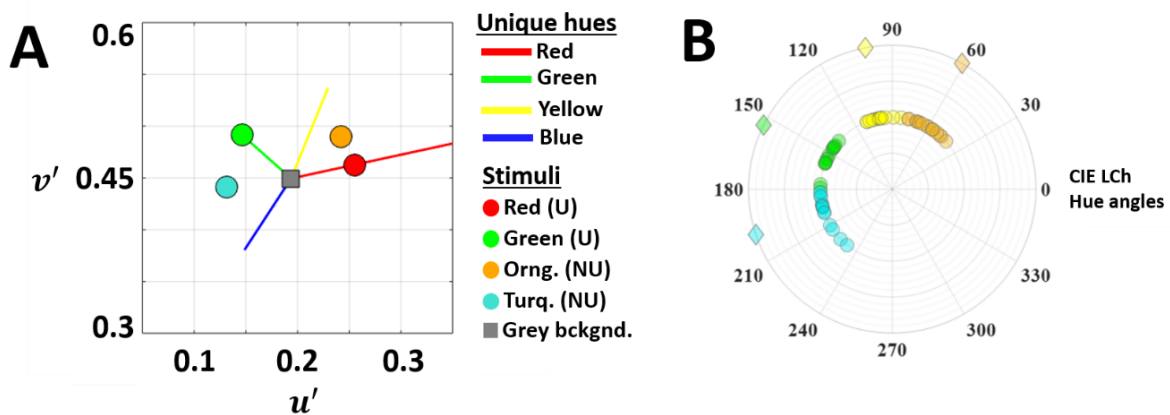

802

803 **Figure S3.** Stimulus coordinates. **A.** Experiment 1. Mean observer settings from a large dataset ( $N =$   
804 185) of unique hues were used to select the unique red (UR) and green (UG) stimuli. The non-unique  
805 hue stimuli were chosen such that orange was equidistant (in terms of hue angle) from UR and unique  
806 yellow (UY), and turquoise was mid-way between UG and unique blue (UB). All stimuli had the same  
807 saturation level (set equal to the maximum possible saturation for UG within the monitor gamut). The  
808 axes are the  $u'$  and  $v'$  coordinates in the perceptually uniform CIE 1976 UCS space. The mean hue  
809 angles for each unique hue from the dataset are shown as solid lines. The length of these lines  
810 indicates the limits of the monitor gamut. The stimuli (unique: U, non-unique: NU) are shown as  
811 coloured dots, while the background is shown as a grey square. **B.** Experiment 2. Polar plot showing  
812 participants' individual settings for unique (yellow and green) and intermediate hues (orange and  
813 turquoise) in CIE LCh colour space. Circles represent participants' individual settings and diamonds  
814 represent the mean of those settings

815 **S4: Behavioural measurements in Experiment 1**

816 During the experiment we also measured accuracy and reaction times on the shape change task, while  
817 at the end of the experiment we captured a category representativeness rating for each colour (see  
818 *Methods* and *Results* for details). Here we show that these measures do not distinguish between  
819 unique and non-unique hues. Furthermore, representativeness ratings provided by the participants  
820 indicate that across all conditions, the turquoise and green stimuli were judged to be the most  
821 representative of their colour name (panel C). Taken together, we see that behavioural measurements  
822 do not correlate with whether a given stimulus was unique or non-unique.

823

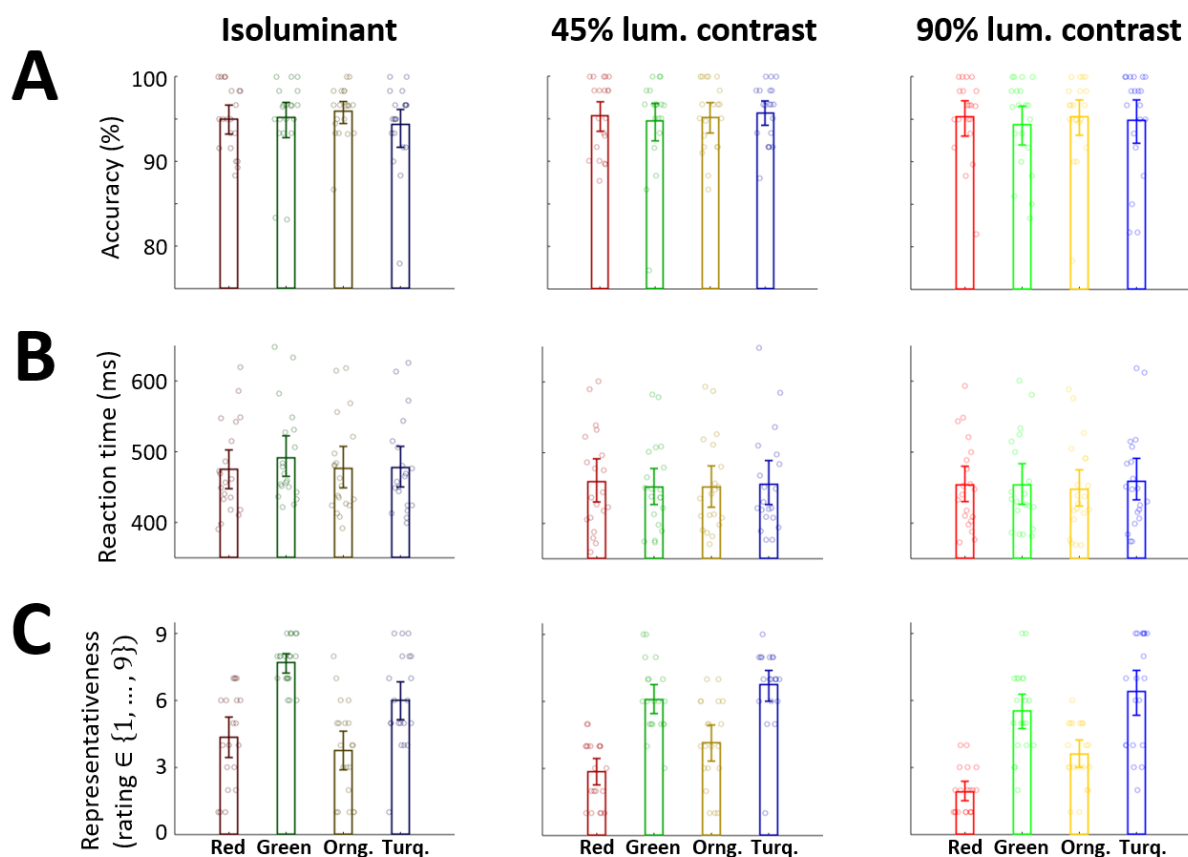

824 **Figure S4.** Behavioural results do not reflect unique/non-unique hue status. **A.** Task accuracy.  
825 During the shape-change segment, the participants were asked to report whether a circular stimulus  
826 changed to a square or a diamond (see *Methods*). The participant accuracy is reported for reach  
827 condition. **B.** Reaction time. During this task, the reaction times were also recorded. **C.**



828 Representativeness ratings. The participants also provided representativeness ratings for the stimuli.  
829 E.g., if a red stimulus was being presented, we asked the participant to rate how this stimulus  
830 represented the category ‘red’. Ratings were reported on a Lickert scale going from 1 to 9. In all  
831 panels, the height of the bar represents the mean, the error bars represent bootstrapped 95%  
832 confidence intervals (1000 samples were drawn), and circles show the raw data (20 participants).  
833

834 **S5: Behavioural measurements in Experiment 2**

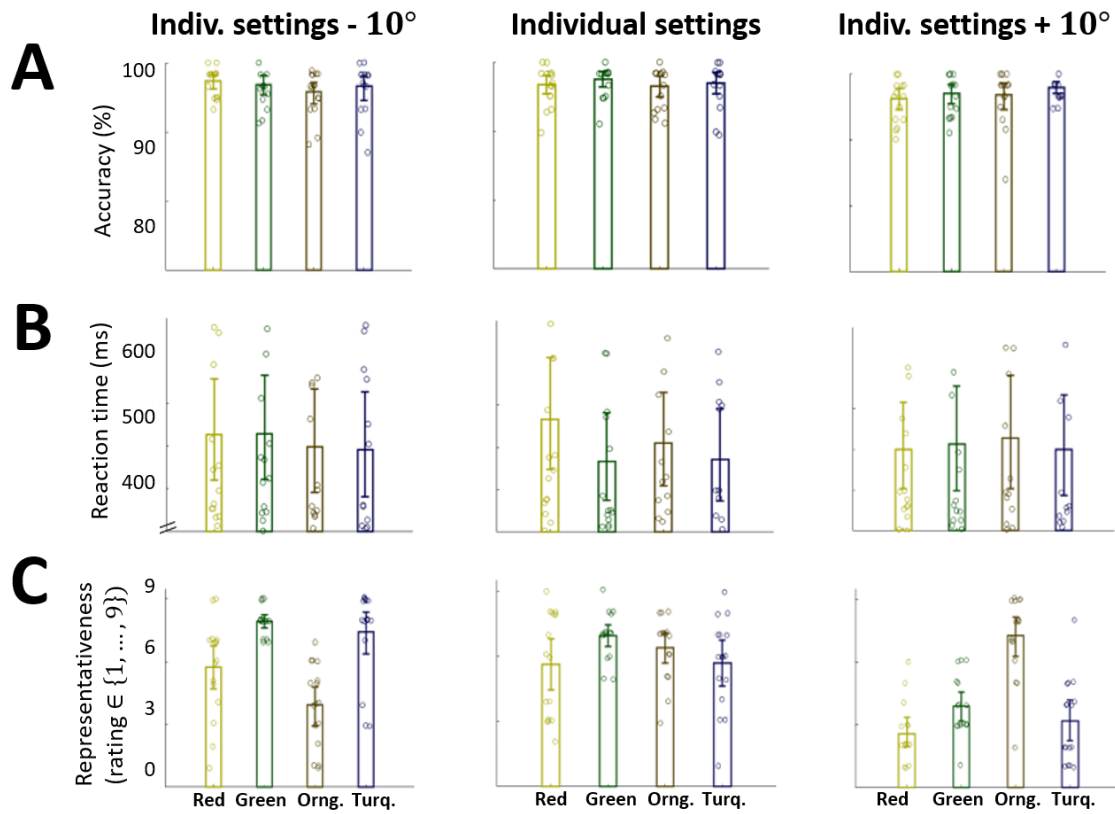

835

836 **Figure S5.** Behavioural results from Experiment 2. **A.** Task accuracy in the shape discrimination  
837 task. **B.** Reaction time recorded during this task. **C.** Categorical representativeness ratings (16  
838 participants). The panels use the same conventions as **Figure S4A, B** and **C** respectively.

839 **V1: Time-course of the confusion matrix**

840 Here, we show how the confusion matrix for isoluminant stimuli changes over time. Between 100-  
841 300ms, unique red and green show increased prediction probabilities, while the non-unique hues do  
842 not. Furthermore, for any presented stimulus, positive deviations from chance are only seen for the  
843 correct label and the proximal hue but not for non-proximal hues (e.g. for a red stimulus, the model  
844 predicts the labels red or orange, but never green or turquoise).

845

846 **Link:** [https://www.dropbox.com/s/b6fzc731fbmksu5/Classification\\_UH\\_Isoluminant.avi?dl=0](https://www.dropbox.com/s/b6fzc731fbmksu5/Classification_UH_Isoluminant.avi?dl=0)

847

848 **Video V1:** The label of the presented stimulus is shown on the x-axis, while the y-axis shows the  
849 label predicted by the model (thus, correct predictions lie on the diagonal going from bottom-left to  
850 top-right). The colour of a given square at time  $t$  represents the predicted label at this instant, and the  
851 intensity of the colour shows the deviation of the prediction probability from the theoretical chance-  
852 level. For clarity of presentation, any negative deviations from chance have been clipped to zero. The  
853 time elapsed from stimulus onset is shown on top.

854

855
